# Supplementary material for: Meroterpenoids with Immunosuppressive Activity from Edible Fungus Craterellus odoratus
Source: MDPI journal article supplement (doi:10.3390/molecules28041564), 2023-02-06

*Supporting Information for*

## **Meroterpenoids with immunosuppressive activity from edible fungus *Craterellus odoratus***

**Quan Dai <sup>1,a</sup>, Li-Ting Pang, <sup>1,a</sup> Fa-Lei Zhang <sup>1</sup>, Gang-Qiang Wang <sup>2</sup>, Xue-Mei Li <sup>3</sup>, Ji-Kai Liu <sup>1,\*</sup> and Tao Feng <sup>1,\*</sup>**

<sup>1</sup> School of Pharmaceutical Sciences, South-Central Minzu University, Wuhan 430074, China

<sup>2</sup> Hubei Key Laboratory of Radiation Chemistry and Functional Materials, Non-power Nuclear Technology Collaborative Innovation Center, School of Nuclear Technology and Chemistry & Biology, Hubei University of Science and Technology, Xianning 437100, China

<sup>3</sup> Plant Protection and Quarantine Station of Dehong, Dehong 678400, China

<sup>a</sup> These authors contribute equally to this work.

\* Correspondence: tfeng@mail.scuec.edu.cn (T. F.); liujikai@mail.scuec.edu.cn (J. K. L)

### **Contents**

**Section S1.** Calculational details for **1**

**Section S2.** Calculational details for **2**

**Section S3.** NMR and MS spectra of **1**

**Section S4.** NMR and MS spectra of **2**

## Section S1. Computational details for 1

### S1.1. Computational details for compound 1 (NMR)

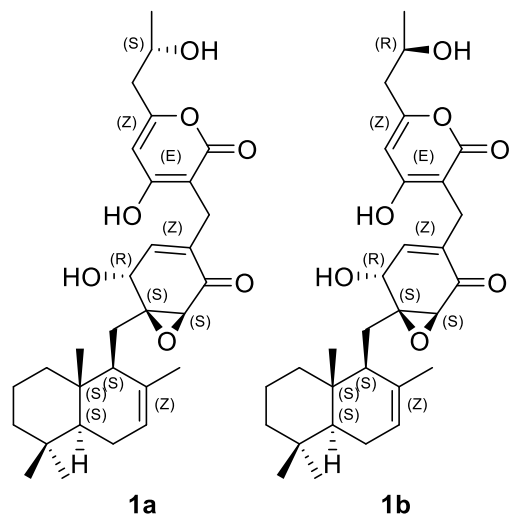

Conformation search based on molecular mechanics with MMFF force fields were performed for **1a** and **1b** gave 16 and 15 stable conformers with populations higher than 1%, respectively. All these conformers were further optimized by the density functional theory method at the B3LYP/6-31G(d) level by Gaussian 16 program package with g09 default keyword. Gauge Independent Atomic Orbital (GIAO) calculations of their  $^1\text{H}$  and  $^{13}\text{C}$  NMR chemical shifts using density functional theory (DFT) at the mPW1PW91/6-311+G(d,p) level with the PCM model in methanol. The calculated NMR data of these conformers were averaged according to the Boltzmann distribution theory and their relative Gibbs free energy. The  $^1\text{H}$  and  $^{13}\text{C}$  NMR chemical shifts for TMS were also calculated by the same procedures and used as the reference. After calculation, the experimental and calculated data were evaluated by linear correlation coefficients ( $R^2$ ) and the improved probability DP4+ method.

**Table S1.** Energy analysis for conformers of **1aA-1aP** at B3LYP/6-31G(d) level in the gas phase

| Species    | $E'=E+ZPE$   | $E$          | $H$          | $G$          | $\Delta G$ | $\Delta E(\text{kcal/mol})$ | $PE\%$ |
|------------|--------------|--------------|--------------|--------------|------------|-----------------------------|--------|
| <b>1aA</b> | -1693.121591 | -1693.085589 | -1693.084645 | -1693.189621 | 0          | 0                           | 67.13% |
| <b>1aB</b> | -1693.119144 | -1693.083080 | -1693.082136 | -1693.188044 | 0.001577   | 0.989582                    | 12.62% |
| <b>1aC</b> | -1693.117762 | -1693.081574 | -1693.080630 | -1693.186632 | 0.002989   | 1.875626                    | 2.83%  |
| <b>1aD</b> | -1693.117941 | -1693.081980 | -1693.081036 | -1693.186324 | 0.003297   | 2.068899                    | 2.04%  |
| <b>1aE</b> | -1693.115998 | -1693.079673 | -1693.078729 | -1693.185513 | 0.004108   | 2.577809                    | 0.86%  |
| <b>1aF</b> | -1693.117556 | -1693.081614 | -1693.080670 | -1693.186013 | 0.003608   | 2.264054                    | 1.47%  |
| <b>1aG</b> | -1693.113081 | -1693.076985 | -1693.076041 | -1693.181908 | 0.007713   | 4.839981                    | 0.02%  |
| <b>1aH</b> | -1693.116180 | -1693.080200 | -1693.079256 | -1693.184354 | 0.005267   | 3.305093                    | 0.25%  |
| <b>1aI</b> | -1693.118793 | -1693.082959 | -1693.082015 | -1693.186672 | 0.002949   | 1.850526                    | 2.95%  |
| <b>1aJ</b> | -1693.119221 | -1693.083200 | -1693.082256 | -1693.187773 | 0.001848   | 1.159638                    | 9.47%  |
| <b>1aK</b> | -1693.115933 | -1693.080190 | -1693.079246 | -1693.183610 | 0.006011   | 3.771960                    | 0.11%  |
| <b>1aL</b> | -1693.115019 | -1693.078885 | -1693.077940 | -1693.183357 | 0.006264   | 3.930720                    | 0.09%  |
| <b>1aM</b> | -1693.114150 | -1693.078176 | -1693.077231 | -1693.182409 | 0.007212   | 4.525599                    | 0.03%  |
| <b>1aN</b> | -1693.112943 | -1693.076725 | -1693.075780 | -1693.181888 | 0.007733   | 4.852531                    | 0.02%  |
| <b>1aO</b> | -1693.114303 | -1693.078198 | -1693.077253 | -1693.183313 | 0.006308   | 3.958330                    | 0.08%  |
| <b>1aP</b> | -1693.114276 | -1693.078232 | -1693.077288 | -1693.182319 | 0.007302   | 4.582074                    | 0.03%  |

$E$ ,  $E'$ ,  $H$ ,  $G$ : total energy, total energy with zero point energy (ZPE), enthalpy, and Gibbs free energy.

**Figure S1.** Main conformers of **1a** in NMR calculation.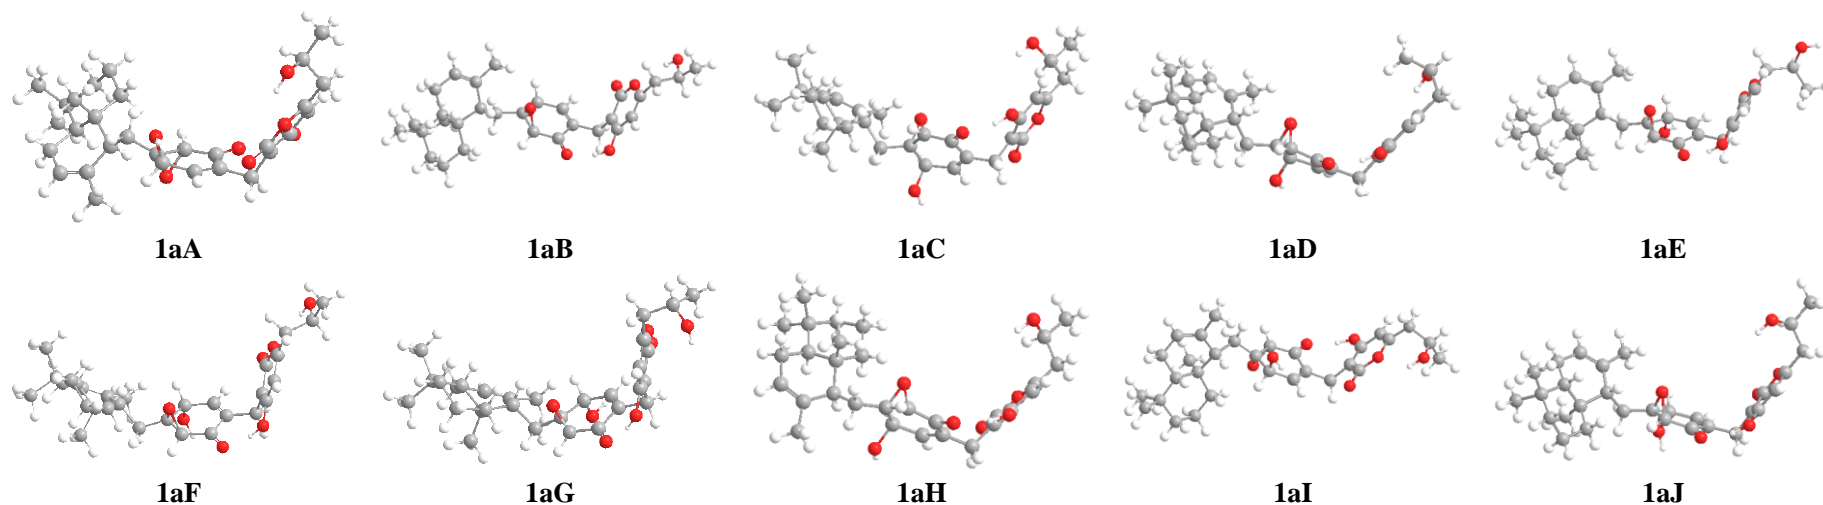

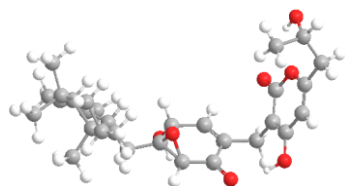

**1aK**

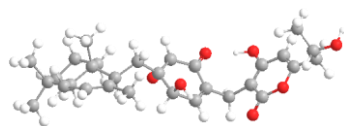

**1aL**

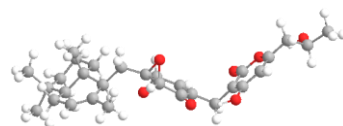

**1aM**

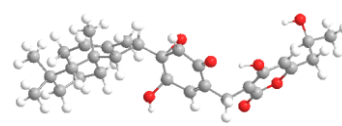

**1aN**

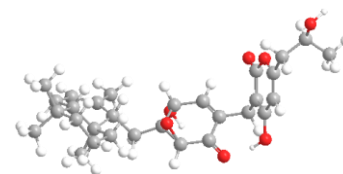

**1aO**

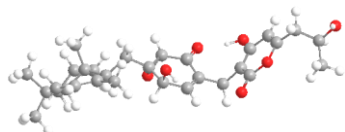

**1aP**

**Table S2.** Energy analysis for conformers of **1bA-1bO** at B3LYP/6-31G(d) level in the gas phase

| Species    | $E'=E+ZPE$   | $E$          | $H$          | $G$          | $\Delta G$ | $\Delta E(\text{kcal/mol})$ | $PE\%$ |
|------------|--------------|--------------|--------------|--------------|------------|-----------------------------|--------|
| <b>1bA</b> | -1693.118054 | -1693.082197 | -1693.081252 | -1693.185564 | 0.003066   | 1.923944                    | 1.28%  |
| <b>1bB</b> | -1693.116921 | -1693.080802 | -1693.079858 | -1693.185526 | 0.003104   | 1.947789                    | 1.23%  |
| <b>1bC</b> | -1693.119366 | -1693.083239 | -1693.082295 | -1693.188611 | 0.000019   | 0.011923                    | 32.34% |
| <b>1bD</b> | -1693.117353 | -1693.081323 | -1693.080379 | -1693.186063 | 0.002567   | 1.610817                    | 2.17%  |
| <b>1bE</b> | -1693.117753 | -1693.081477 | -1693.080533 | -1693.187555 | 0.001075   | 0.674573                    | 10.56% |
| <b>1bF</b> | -1693.117690 | -1693.081779 | -1693.080835 | -1693.185486 | 0.003144   | 1.972890                    | 1.18%  |
| <b>1bG</b> | -1693.118658 | -1693.082630 | -1693.081686 | -1693.186814 | 0.001816   | 1.139557                    | 4.82%  |
| <b>1bH</b> | -1693.118315 | -1693.082326 | -1693.081382 | -1693.186605 | 0.002025   | 1.270707                    | 3.86%  |
| <b>1bI</b> | -1693.118752 | -1693.082986 | -1693.082042 | -1693.186073 | 0.002557   | 1.604542                    | 2.20%  |
| <b>1bJ</b> | -1693.120432 | -1693.084627 | -1693.083682 | -1693.188630 | 0          | 0                           | 33.00% |
| <b>1bK</b> | -1693.11616  | -1693.080027 | -1693.079083 | -1693.184822 | 0.003808   | 2.389556                    | 0.58%  |
| <b>1bL</b> | -1693.113694 | -1693.077551 | -1693.076607 | -1693.182597 | 0.006033   | 3.785765                    | 0.06%  |
| <b>1bM</b> | -1693.116394 | -1693.080591 | -1693.079647 | -1693.184068 | 0.004562   | 2.862698                    | 0.26%  |
| <b>1bN</b> | -1693.119256 | -1693.083498 | -1693.082553 | -1693.187002 | 0.001628   | 1.021585                    | 5.88%  |
| <b>1bO</b> | -1693.116048 | -1693.079981 | -1693.079037 | -1693.184846 | 0.003784   | 2.374496                    | 0.60%  |

$E$ ,  $E'$ ,  $H$ ,  $G$ : total energy, total energy with zero point energy ( $ZPE$ ), enthalpy, and Gibbs free energy.

**Figure S2.** Main conformers of **1b** in NMR and ECD calculations.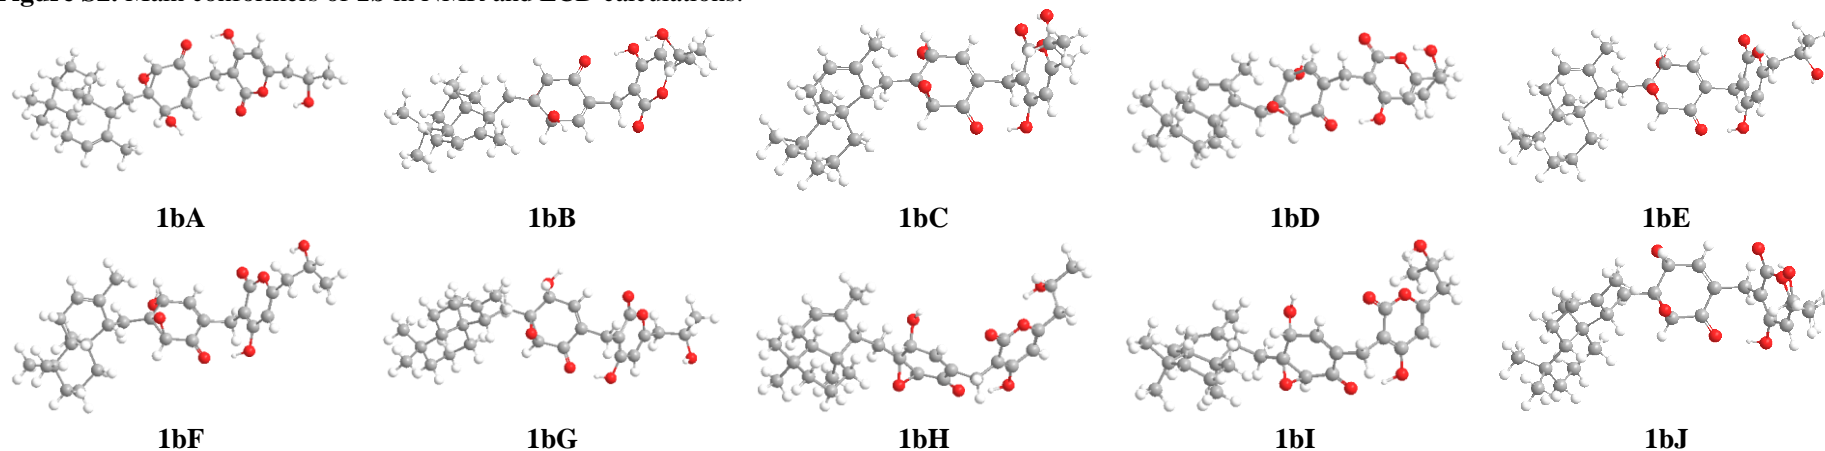

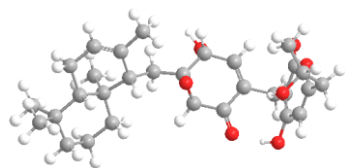

**1bK**

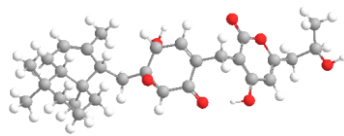

**1bL**

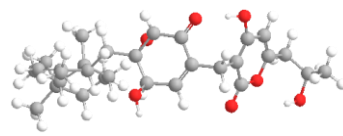

**1bM**

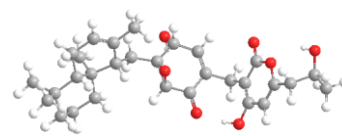

**1bN**

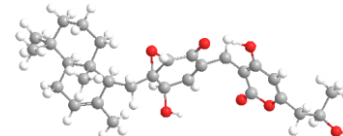

**1bO**

**Table S3.** Calculated  $^{13}\text{C}$  NMR results for **1a**

| No.        | 1aA    | 1aB    | 1aC    | 1aD    | 1aE    | 1aF    | 1aG    | 1aH    | 1aI    | 1aJ    | 1aK    | 1aL    | 1aM    | 1aN    | 1aO    | 1aP    | $\delta_{\text{Calcd}}^a$ | $\delta_{\text{Exp}}$ | $\delta_{\text{Corr}}^b$ | Relative errors <sup>c</sup> |
|------------|--------|--------|--------|--------|--------|--------|--------|--------|--------|--------|--------|--------|--------|--------|--------|--------|---------------------------|-----------------------|--------------------------|------------------------------|
| 1          | 145.95 | 146.63 | 147.10 | 147.44 | 146.75 | 149.33 | 146.64 | 143.78 | 144.89 | 147.41 | 146.92 | 147.75 | 148.52 | 149.00 | 149.08 | 147.55 | 41.9                      | 40.5                  | 39.3                     | 1.2                          |
| 2          | 165.74 | 165.98 | 165.45 | 164.88 | 165.70 | 166.08 | 165.57 | 165.33 | 165.53 | 165.33 | 165.11 | 165.87 | 165.57 | 165.05 | 165.77 | 165.59 | 22.5                      | 19.6                  | 20.9                     | -1.3                         |
| 3          | 144.42 | 143.86 | 144.21 | 143.77 | 143.73 | 144.06 | 144.89 | 144.29 | 143.92 | 143.92 | 143.16 | 144.74 | 144.66 | 144.05 | 144.31 | 143.88 | 43.9                      | 43.4                  | 41.2                     | 2.2                          |
| 4          | 149.58 | 149.42 | 149.91 | 149.94 | 149.23 | 149.41 | 149.85 | 149.23 | 149.29 | 149.73 | 149.60 | 149.53 | 149.62 | 148.98 | 149.02 | 149.34 | 38.6                      | 33.9                  | 36.2                     | -2.3                         |
| 5          | 132.14 | 132.29 | 132.63 | 131.98 | 133.39 | 129.42 | 132.49 | 133.88 | 133.91 | 133.02 | 133.55 | 132.20 | 131.60 | 133.52 | 133.09 | 132.07 | 55.9                      | 51.4                  | 52.5                     | -1.1                         |
| 6          | 160.51 | 159.62 | 160.62 | 160.93 | 159.74 | 160.80 | 160.70 | 161.08 | 161.48 | 160.50 | 159.99 | 160.18 | 160.41 | 159.87 | 159.67 | 160.44 | 27.7                      | 24.8                  | 25.9                     | -1.1                         |
| 7          | 57.22  | 57.81  | 57.43  | 57.05  | 58.25  | 55.43  | 57.61  | 56.05  | 54.91  | 57.10  | 55.48  | 56.74  | 57.50  | 57.32  | 55.71  | 56.42  | 131.0                     | 123.2                 | 123.5                    | -0.3                         |
| 8          | 41.60  | 42.17  | 41.83  | 42.26  | 42.03  | 42.21  | 42.38  | 41.95  | 41.77  | 42.17  | 42.51  | 41.96  | 43.01  | 42.69  | 42.05  | 42.10  | 146.4                     | 136.1                 | 138.0                    | -1.9                         |
| 9          | 135.82 | 135.50 | 136.48 | 137.81 | 136.09 | 131.89 | 132.51 | 130.95 | 131.17 | 136.38 | 133.35 | 131.84 | 135.12 | 135.09 | 131.85 | 132.48 | 52.5                      | 48.0                  | 49.3                     | -1.3                         |
| 10         | 147.71 | 146.84 | 147.14 | 147.07 | 146.28 | 147.40 | 146.31 | 147.37 | 145.54 | 146.80 | 146.27 | 146.00 | 147.00 | 144.73 | 145.83 | 145.33 | 40.8                      | 37.3                  | 38.2                     | -0.9                         |
| 11         | 165.31 | 165.82 | 164.92 | 164.56 | 165.63 | 164.93 | 164.61 | 165.11 | 164.94 | 165.06 | 165.55 | 164.48 | 164.42 | 164.02 | 164.41 | 164.41 | 22.9                      | 33.6                  | 21.3                     | 12.3                         |
| 12         | 154.31 | 154.69 | 154.48 | 154.50 | 154.46 | 154.94 | 154.56 | 153.44 | 153.61 | 154.40 | 154.46 | 154.45 | 153.86 | 154.50 | 154.79 | 154.00 | 33.8                      | 22.2                  | 31.6                     | -9.4                         |
| 13         | 173.33 | 173.19 | 173.90 | 173.30 | 173.11 | 175.04 | 173.78 | 171.95 | 172.58 | 173.87 | 173.95 | 173.36 | 174.32 | 174.32 | 173.94 | 173.85 | 14.8                      | 14.2                  | 13.7                     | 0.5                          |
| 14         | 164.48 | 164.66 | 164.83 | 163.79 | 164.52 | 163.09 | 164.38 | 162.77 | 162.74 | 164.70 | 163.35 | 164.13 | 161.56 | 161.00 | 162.56 | 163.52 | 23.7                      | 22.1                  | 22.1                     | 0.0                          |
| 15         | 158.94 | 158.85 | 158.61 | 159.12 | 159.13 | 159.37 | 160.06 | 154.01 | 153.95 | 158.81 | 158.95 | 157.66 | 150.89 | 150.74 | 160.75 | 158.63 | 29.4                      | 26.6                  | 27.5                     | -0.9                         |
| 1'         | 118.48 | 117.39 | 117.88 | 117.91 | 117.52 | 112.91 | 115.00 | 115.12 | 115.79 | 116.06 | 113.45 | 115.15 | 116.60 | 117.16 | 112.98 | 114.96 | 70.3                      | 66.2                  | 66.1                     | 0.1                          |
| 2'         | 127.62 | 128.61 | 128.47 | 128.54 | 128.80 | 121.24 | 120.97 | 123.95 | 122.17 | 128.33 | 121.03 | 120.40 | 120.14 | 120.61 | 121.16 | 120.21 | 60.6                      | 58.0                  | 57.0                     | 1.0                          |
| 3'         | -24.21 | -23.82 | -23.28 | -23.09 | -23.82 | -23.29 | -21.83 | -22.87 | -23.68 | -23.17 | -23.06 | -23.90 | -23.16 | -23.79 | -23.23 | -23.87 | 212.2                     | 197.1                 | 200.2                    | -3.1                         |
| 4'         | 45.03  | 48.29  | 48.22  | 47.41  | 48.32  | 46.70  | 47.31  | 47.46  | 44.81  | 47.14  | 47.07  | 45.40  | 49.60  | 49.85  | 46.77  | 44.98  | 142.3                     | 134.5                 | 134.2                    | 0.3                          |
| 5'         | 29.52  | 29.33  | 28.65  | 28.44  | 29.38  | 30.01  | 29.47  | 29.54  | 29.37  | 29.24  | 29.19  | 29.88  | 28.80  | 28.92  | 30.12  | 29.67  | 158.8                     | 140.7                 | 149.7                    | -9.0                         |
| 6'         | 115.79 | 116.09 | 116.50 | 115.99 | 116.20 | 117.08 | 118.89 | 118.19 | 118.79 | 115.76 | 117.32 | 119.37 | 113.48 | 113.52 | 117.23 | 118.86 | 72.2                      | 67.8                  | 67.9                     | -0.1                         |
| 7'         | 161.91 | 161.06 | 160.51 | 159.85 | 161.33 | 159.87 | 160.27 | 160.54 | 161.11 | 160.40 | 160.25 | 161.49 | 160.64 | 161.17 | 160.01 | 160.66 | 26.7                      | 23.2                  | 24.9                     | -1.7                         |
| 1''        | 16.78  | 17.13  | 17.42  | 17.42  | 16.51  | 17.21  | 17.04  | 16.88  | 17.00  | 17.55  | 16.95  | 16.09  | 17.36  | 17.26  | 16.99  | 16.07  | 171.2                     | 171.2                 | 161.5                    | 9.7                          |
| 2''        | 85.42  | 83.59  | 80.63  | 82.83  | 83.39  | 85.63  | 81.96  | 83.70  | 82.39  | 80.96  | 86.40  | 83.17  | 81.80  | 81.72  | 84.18  | 81.87  | 103.7                     | 99.6                  | 97.7                     | 1.9                          |
| 3''        | 13.09  | 14.63  | 15.86  | 14.91  | 15.03  | 13.79  | 15.41  | 14.28  | 14.09  | 15.79  | 13.81  | 14.83  | 14.28  | 16.08  | 14.71  | 13.96  | 174.5                     | 169.2                 | 164.5                    | 4.7                          |
| 4''        | 81.14  | 81.46  | 79.41  | 79.10  | 79.83  | 80.78  | 79.26  | 79.46  | 78.84  | 79.44  | 79.16  | 79.51  | 81.49  | 79.54  | 79.89  | 79.77  | 107.3                     | 104.1                 | 101.1                    | 3.0                          |
| 5''        | 12.75  | 12.54  | 16.10  | 13.15  | 15.76  | 12.49  | 16.80  | 16.02  | 12.95  | 16.03  | 12.90  | 16.31  | 12.85  | 15.98  | 15.65  | 15.99  | 175.0                     | 163.0                 | 165.1                    | -2.1                         |
| 6''        | 141.51 | 141.58 | 138.87 | 143.05 | 141.74 | 142.44 | 142.33 | 139.14 | 142.90 | 138.85 | 143.23 | 139.57 | 141.47 | 138.86 | 141.71 | 138.86 | 46.9                      | 44.0                  | 44.0                     | 0.0                          |
| 7''        | 116.26 | 116.53 | 117.54 | 116.37 | 116.90 | 116.63 | 117.38 | 118.02 | 115.90 | 117.47 | 116.36 | 116.29 | 116.60 | 117.75 | 117.10 | 113.26 | 71.7                      | 66.2                  | 67.5                     | -1.3                         |
| 8''        | 163.84 | 163.81 | 164.95 | 165.32 | 163.68 | 163.61 | 164.47 | 164.52 | 164.46 | 164.96 | 165.26 | 164.25 | 163.60 | 164.84 | 163.86 | 163.36 | 24.2                      | 23.3                  | 22.5                     | 0.8                          |
| Population | 67.13% | 12.62% | 2.83%  | 2.04%  | 0.86%  | 1.47%  | 0.02%  | 0.25%  | 2.95%  | 9.47%  | 0.11%  | 0.09%  | 0.03%  | 0.02%  | 0.08%  | 0.03%  |                           |                       | RMSD                     | 4.1                          |

<sup>a</sup>Weighted average from the calculated shifts; <sup>b</sup>Obtained by linear fit  $\delta_{\text{exp}}$  versus  $\delta_{\text{calcd}}$ ; <sup>c</sup> $\Delta\delta = \delta_{\text{exp}} - \delta_{\text{calcd}}$

**Table S4.** Calculated  $^{13}\text{C}$  NMR results for **1b**

| No.        | 1bA    | 1bB    | 1bC    | 1bD    | 1bE    | 1bF    | 1bG    | 1bH    | 1bI    | 1bJ    | 1bK    | 1bL    | 1bM    | 1bN    | 1bO    | $\delta_{\text{Calcd}}^a$ | $\delta_{\text{Exp}}$ | $\delta_{\text{Corr}}^b$ | Relative errors <sup>c</sup> |
|------------|--------|--------|--------|--------|--------|--------|--------|--------|--------|--------|--------|--------|--------|--------|--------|---------------------------|-----------------------|--------------------------|------------------------------|
| 1          | 147.48 | 147.59 | 147.41 | 148.14 | 146.69 | 147.56 | 146.78 | 144.89 | 144.41 | 147.35 | 147.00 | 147.94 | 144.56 | 147.27 | 147.38 | 41.1                      | 40.5                  | 38.3                     | 2.2                          |
| 2          | 165.55 | 165.87 | 165.16 | 165.56 | 165.74 | 164.76 | 165.22 | 165.79 | 164.86 | 164.82 | 165.54 | 165.70 | 165.31 | 164.73 | 165.58 | 23.1                      | 19.6                  | 21.3                     | -1.7                         |
| 3          | 143.84 | 144.79 | 143.86 | 144.16 | 143.89 | 143.47 | 144.17 | 143.98 | 145.36 | 143.79 | 144.35 | 143.94 | 144.30 | 143.64 | 144.12 | 44.3                      | 43.4                  | 41.4                     | 2.0                          |
| 4          | 149.28 | 149.49 | 150.07 | 149.22 | 149.33 | 149.87 | 149.55 | 149.41 | 149.30 | 149.89 | 149.95 | 149.45 | 149.20 | 149.99 | 149.53 | 38.4                      | 33.9                  | 35.8                     | -1.9                         |
| 5          | 132.50 | 132.31 | 130.99 | 133.00 | 133.58 | 132.80 | 133.57 | 132.67 | 134.28 | 132.12 | 132.39 | 131.57 | 134.23 | 132.28 | 131.59 | 56.1                      | 51.4                  | 52.6                     | -1.2                         |
| 6          | 160.39 | 160.21 | 161.34 | 160.40 | 159.95 | 160.12 | 160.66 | 161.30 | 161.62 | 160.86 | 160.77 | 160.36 | 160.77 | 160.62 | 160.78 | 27.3                      | 24.8                  | 25.3                     | -0.5                         |
| 7          | 56.34  | 56.71  | 56.36  | 55.71  | 58.31  | 56.86  | 57.15  | 54.78  | 55.66  | 57.38  | 57.11  | 56.68  | 56.99  | 56.44  | 56.16  | 131.3                     | 123.2                 | 123.9                    | -0.7                         |
| 8          | 42.07  | 41.94  | 42.39  | 42.33  | 42.02  | 42.32  | 41.57  | 42.17  | 41.30  | 42.30  | 42.08  | 42.02  | 42.22  | 42.47  | 42.19  | 145.9                     | 136.1                 | 137.8                    | -1.7                         |
| 9          | 132.50 | 131.91 | 138.01 | 132.13 | 136.59 | 137.68 | 137.78 | 129.22 | 130.71 | 137.82 | 136.87 | 132.26 | 130.08 | 137.58 | 132.36 | 51.3                      | 48.0                  | 48.0                     | 0.0                          |
| 10         | 145.46 | 145.92 | 147.58 | 146.26 | 146.32 | 146.62 | 145.34 | 147.34 | 145.65 | 147.00 | 147.21 | 145.26 | 146.55 | 147.07 | 145.79 | 41.2                      | 37.3                  | 38.5                     | -1.2                         |
| 11         | 164.82 | 164.49 | 164.76 | 165.70 | 165.44 | 164.40 | 164.19 | 164.37 | 164.33 | 164.57 | 165.09 | 163.66 | 163.28 | 164.53 | 164.47 | 23.5                      | 33.6                  | 21.7                     | 11.9                         |
| 12         | 153.95 | 154.36 | 154.35 | 154.16 | 154.29 | 154.44 | 153.67 | 153.87 | 153.82 | 154.63 | 154.48 | 154.06 | 153.40 | 154.40 | 153.98 | 33.8                      | 22.2                  | 31.5                     | -9.3                         |
| 13         | 173.94 | 173.33 | 173.40 | 174.65 | 173.13 | 173.54 | 173.18 | 172.07 | 173.39 | 173.35 | 173.83 | 173.78 | 172.67 | 173.38 | 173.95 | 14.9                      | 14.2                  | 13.5                     | 0.7                          |
| 14         | 163.46 | 164.09 | 163.86 | 163.01 | 164.42 | 163.72 | 164.58 | 162.69 | 162.60 | 163.90 | 165.01 | 163.78 | 162.68 | 163.79 | 163.07 | 24.3                      | 22.1                  | 22.5                     | -0.4                         |
| 15         | 158.45 | 157.60 | 158.97 | 158.70 | 159.18 | 159.13 | 158.82 | 154.07 | 154.59 | 159.31 | 158.76 | 158.86 | 154.03 | 159.18 | 159.18 | 29.4                      | 26.6                  | 27.3                     | -0.7                         |
| 1'         | 114.88 | 115.19 | 117.80 | 114.91 | 117.48 | 117.47 | 117.99 | 115.80 | 115.77 | 115.86 | 115.34 | 115.06 | 114.85 | 115.78 | 111.94 | 71.5                      | 66.2                  | 67.2                     | -1.0                         |
| 2'         | 120.30 | 120.48 | 128.67 | 121.08 | 128.71 | 129.06 | 127.31 | 122.45 | 122.50 | 128.49 | 128.51 | 120.08 | 123.74 | 128.25 | 119.91 | 60.5                      | 58.0                  | 56.7                     | 1.3                          |
| 3'         | -23.95 | -23.84 | -22.93 | -24.37 | -23.74 | -22.73 | -23.69 | -23.29 | -23.75 | -23.26 | -22.93 | -23.91 | -22.54 | -23.55 | -23.76 | 211.5                     | 197.1                 | 199.9                    | -2.8                         |
| 4'         | 44.97  | 45.55  | 47.33  | 45.08  | 48.20  | 47.44  | 44.98  | 45.38  | 45.27  | 46.71  | 47.45  | 44.69  | 47.11  | 47.07  | 44.42  | 141.3                     | 134.5                 | 133.4                    | 1.1                          |
| 5'         | 29.57  | 29.88  | 28.25  | 29.62  | 29.30  | 28.65  | 29.50  | 29.43  | 30.08  | 29.14  | 28.94  | 29.84  | 29.54  | 29.89  | 29.91  | 159.2                     | 140.7                 | 150.3                    | -9.6                         |
| 6'         | 118.98 | 119.42 | 115.99 | 119.47 | 116.44 | 116.00 | 116.01 | 118.57 | 118.56 | 115.68 | 116.25 | 118.64 | 118.46 | 115.80 | 118.04 | 71.9                      | 67.8                  | 67.6                     | 0.2                          |
| 7'         | 160.74 | 161.72 | 160.22 | 161.31 | 161.11 | 160.05 | 160.68 | 161.14 | 160.65 | 159.72 | 160.55 | 160.67 | 160.83 | 160.26 | 160.80 | 27.9                      | 23.2                  | 25.9                     | -2.7                         |
| 1''        | 16.73  | 16.22  | 17.40  | 16.46  | 16.48  | 17.53  | 16.90  | 16.42  | 17.22  | 17.46  | 17.46  | 15.95  | 17.63  | 17.89  | 16.15  | 170.9                     | 171.2                 | 161.5                    | 9.7                          |
| 2''        | 82.20  | 82.97  | 83.11  | 83.33  | 84.15  | 81.61  | 80.61  | 80.93  | 82.72  | 83.38  | 81.14  | 80.85  | 83.81  | 82.27  | 82.48  | 105.2                     | 99.6                  | 99.1                     | 0.5                          |
| 3''        | 13.52  | 15.43  | 14.58  | 14.65  | 15.11  | 14.92  | 15.27  | 15.60  | 14.41  | 14.56  | 15.80  | 14.63  | 14.28  | 14.84  | 13.80  | 173.5                     | 169.2                 | 163.9                    | 5.3                          |
| 4''        | 81.06  | 78.49  | 81.07  | 78.39  | 79.30  | 79.42  | 78.64  | 78.75  | 78.15  | 80.96  | 79.18  | 77.68  | 79.20  | 79.60  | 79.58  | 107.8                     | 104.1                 | 101.6                    | 2.5                          |
| 5''        | 12.77  | 16.06  | 12.50  | 13.15  | 15.60  | 12.98  | 16.28  | 15.85  | 13.19  | 12.35  | 17.07  | 15.86  | 13.22  | 12.62  | 15.88  | 175.0                     | 163.0                 | 165.3                    | -2.3                         |
| 6''        | 141.79 | 139.22 | 141.47 | 143.16 | 139.78 | 142.70 | 141.93 | 139.32 | 142.97 | 141.48 | 142.14 | 143.83 | 143.08 | 142.52 | 142.21 | 46.8                      | 44.0                  | 43.8                     | 0.2                          |
| 7''        | 116.88 | 117.64 | 116.36 | 116.25 | 117.92 | 116.17 | 117.51 | 118.35 | 115.92 | 116.40 | 117.75 | 116.81 | 115.93 | 116.58 | 117.01 | 71.5                      | 66.2                  | 67.2                     | -1.0                         |
| 8''        | 163.39 | 164.69 | 163.65 | 164.98 | 164.50 | 165.10 | 164.63 | 164.45 | 164.99 | 163.69 | 164.47 | 165.03 | 164.68 | 165.56 | 163.82 | 24.1                      | 23.3                  | 22.3                     | 1.0                          |
| Population | 1.28%  | 1.23%  | 32.34% | 2.17%  | 10.56% | 1.18%  | 4.82%  | 3.86%  | 2.20%  | 33.00% | 0.58%  | 0.06%  | 0.26%  | 5.88%  | 0.60%  |                           |                       | RMSD                     | 4.1                          |

<sup>a</sup>Weighted average from the calculated shifts; <sup>b</sup>Obtained by linear fit  $\delta_{\text{exp}}$  versus  $\delta_{\text{calcd}}$ ; <sup>c</sup> $\Delta\delta = \delta_{\text{exp}} - \delta_{\text{calcd}}$



**Figure S3.**  $^{13}\text{C}$  NMR calculation results of two possible isomers of **1**. (A) Linear correlation plots of predicted versus experimental  $^{13}\text{C}$  NMR chemical shifts. (B) Relative errors between the predicted  $^{13}\text{C}$  NMR chemical shifts of two potential structures and recorded  $^{13}\text{C}$  NMR data.

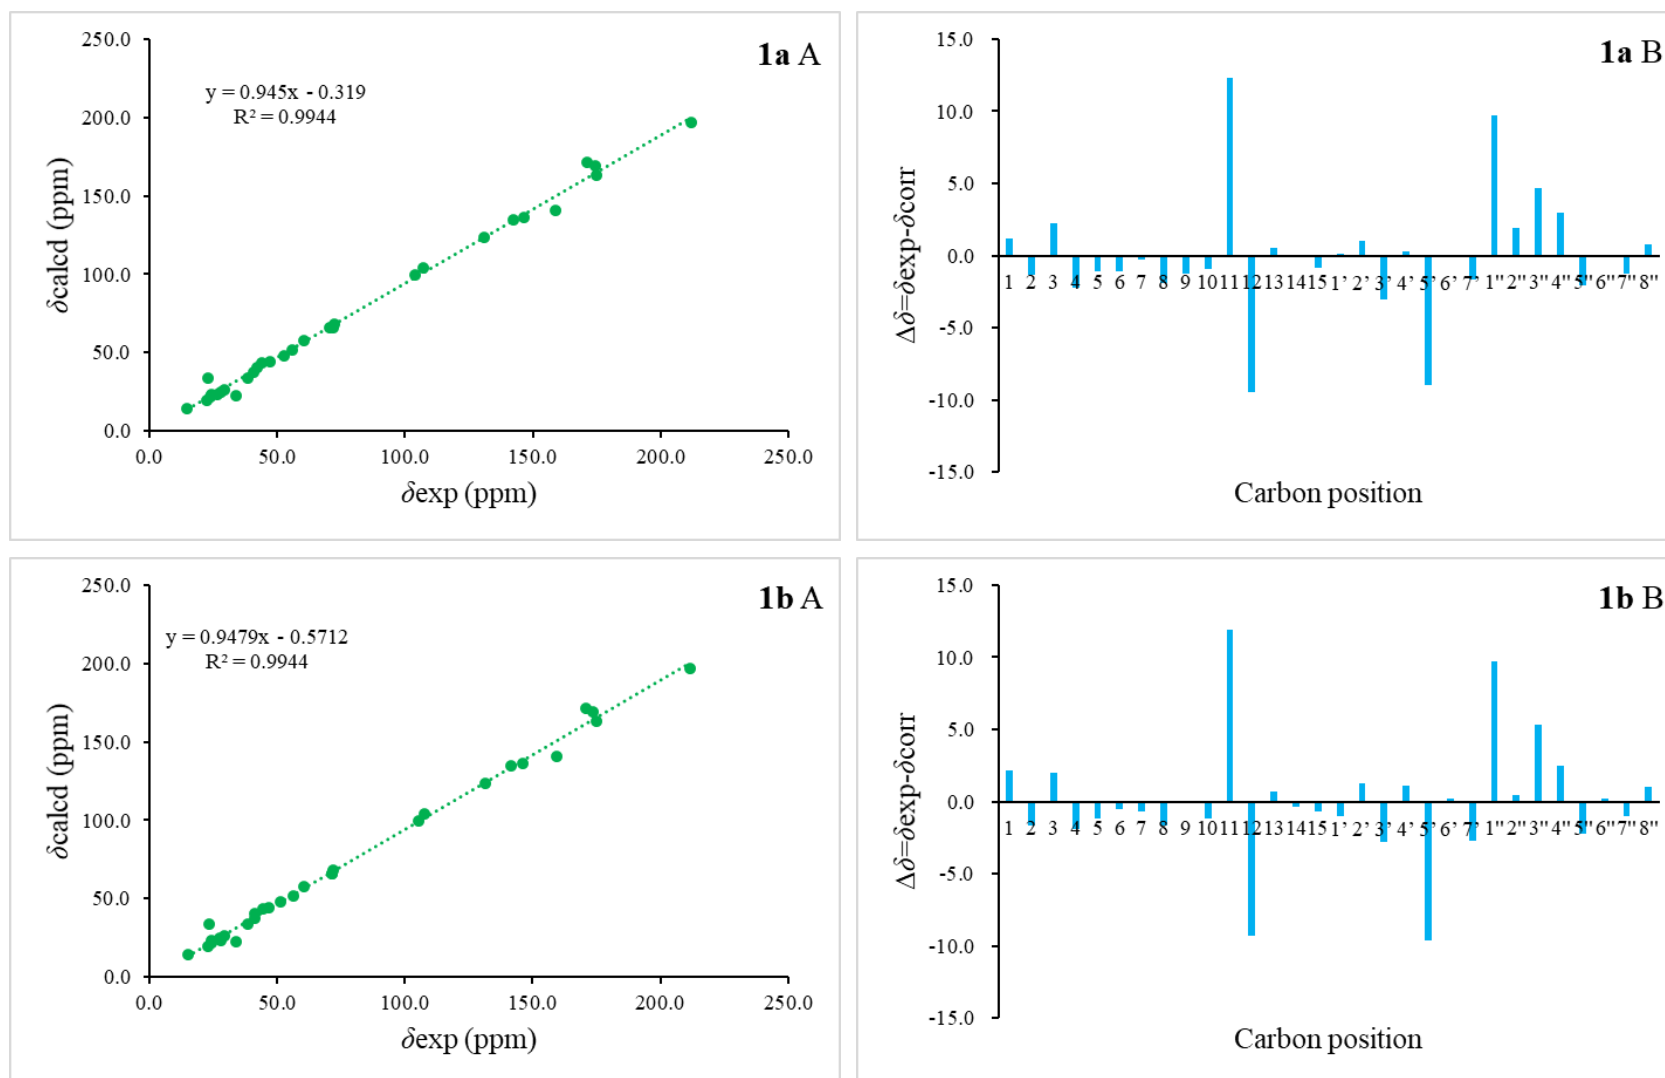

**Table S5.** DP4+ analysis results of **1a** (Isomer 1) and **1b** (Isomer 2)

|    | A          | B    | C            | D        | E            | F        | G                 | H        |
|----|------------|------|--------------|----------|--------------|----------|-------------------|----------|
| 1  | Functional |      | Solvent?     |          | Basis Set    |          | Type of Data      |          |
| 2  | mPW1PW91   |      | PCM          |          | 6-311+G(d,p) |          | Shielding Tensors |          |
| 3  |            |      |              |          |              |          |                   |          |
| 12 |            |      | DP4+         | 0.00%    | 100.00%      | —        | —                 | —        |
| 14 | Nuclei     | sp2? | Experimental | Isomer 1 | Isomer 2     | Isomer 3 | Isomer 4          | Isomer 5 |
| 15 | C          |      | 40.6         | 146.26   | 147.13       |          |                   |          |
| 16 | C          |      | 19.8         | 165.70   | 165.13       |          |                   |          |
| 17 | C          |      | 43.4         | 144.25   | 143.90       |          |                   |          |
| 18 | C          |      | 33.9         | 149.58   | 149.82       |          |                   |          |
| 19 | C          |      | 51.4         | 132.28   | 132.09       |          |                   |          |
| 20 | C          |      | 24.8         | 160.43   | 160.89       |          |                   |          |
| 21 | C          | x    | 123.3        | 57.19    | 56.87        |          |                   |          |
| 22 | C          | x    | 135.9        | 41.76    | 42.24        |          |                   |          |
| 23 | C          |      | 48.1         | 135.67   | 136.92       |          |                   |          |
| 24 | C          |      | 37.2         | 147.40   | 146.96       |          |                   |          |
| 25 | C          |      | 33.7         | 165.31   | 164.71       |          |                   |          |
| 26 | C          |      | 22.3         | 154.36   | 154.37       |          |                   |          |
| 27 | C          |      | 14.2         | 173.38   | 173.33       |          |                   |          |
| 28 | C          |      | 22.2         | 164.44   | 163.87       |          |                   |          |
| 29 | C          |      | 26.6         | 158.75   | 158.78       |          |                   |          |
| 30 | C          |      | 66.2         | 117.89   | 116.70       |          |                   |          |
| 31 | C          |      | 58.1         | 127.57   | 127.71       |          |                   |          |
| 32 | C          | x    | 197.1        | −23.98   | −23.29       |          |                   |          |
| 33 | C          | x    | 134.6        | 45.84    | 46.85        |          |                   |          |
| 34 | C          | x    | 141          | 29.42    | 28.99        |          |                   |          |
| 35 | C          |      | 67.7         | 115.97   | 116.26       |          |                   |          |
| 36 | C          |      | 23.2         | 161.51   | 160.27       |          |                   |          |
| 37 | C          | x    | 171.2        | 16.94    | 17.23        |          |                   |          |
| 38 | C          | x    | 99.2         | 84.46    | 83.01        |          |                   |          |
| 39 | C          | x    | 168.7        | 13.72    | 14.72        |          |                   |          |
| 40 | C          | x    | 104.2        | 80.83    | 80.35        |          |                   |          |
| 41 | C          | x    | 163          | 13.18    | 13.23        |          |                   |          |
| 42 | C          |      | 44.1         | 141.27   | 141.37       |          |                   |          |
| 43 | C          |      | 66.2         | 116.45   | 116.70       |          |                   |          |
| 44 | C          |      | 23.4         | 164.02   | 164.04       |          |                   |          |
| 45 |            |      |              |          |              |          |                   |          |
| 46 | H          |      | 1.79         | 30.24    | 30.11        |          |                   |          |
| 47 | H          |      | 0.9          | 31.04    | 30.95        |          |                   |          |
| 48 | H          |      | 1.55         | 30.00    | 30.16        |          |                   |          |
| 49 | H          |      | 1.44         | 30.48    | 30.35        |          |                   |          |
| 50 | H          |      | 1.4          | 30.29    | 30.52        |          |                   |          |
| 51 | H          |      | 1.19         | 30.49    | 30.52        |          |                   |          |
| 52 | H          |      | 1.19         | 30.26    | 30.32        |          |                   |          |
| 53 | H          |      | 1.96         | 29.78    | 30.00        |          |                   |          |
| 54 | H          |      | 1.84         | 29.88    | 29.88        |          |                   |          |
| 55 | H          | x    | 5.38         | 25.88    | 25.99        |          |                   |          |
| 56 | H          |      | 1.51         | 30.36    | 30.26        |          |                   |          |
| 57 | H          |      | 0.85         | 30.41    | 30.40        |          |                   |          |
| 58 | H          |      | 0.85         | 31.21    | 31.29        |          |                   |          |

|    |   |   |      |       |       |  |  |  |
|----|---|---|------|-------|-------|--|--|--|
| 59 | H |   | 0.85 | 30.75 | 30.67 |  |  |  |
| 60 | H |   | 0.88 | 31.06 | 30.89 |  |  |  |
| 61 | H |   | 0.88 | 31.32 | 31.50 |  |  |  |
| 62 | H |   | 0.88 | 30.43 | 30.41 |  |  |  |
| 63 | H |   | 0.78 | 30.65 | 30.49 |  |  |  |
| 64 | H |   | 0.78 | 31.36 | 30.78 |  |  |  |
| 65 | H |   | 0.78 | 30.35 | 31.25 |  |  |  |
| 66 | H |   | 1.62 | 30.26 | 30.14 |  |  |  |
| 67 | H |   | 1.62 | 29.85 | 29.86 |  |  |  |
| 68 | H |   | 1.62 | 29.98 | 29.91 |  |  |  |
| 69 | H |   | 2.18 | 29.73 | 29.76 |  |  |  |
| 70 | H |   | 1.99 | 29.81 | 29.71 |  |  |  |
| 71 | H |   | 3.25 | 28.41 | 28.46 |  |  |  |
| 72 | H | x | 6.2  | 24.09 | 24.32 |  |  |  |
| 73 | H |   | 4.34 | 26.99 | 27.09 |  |  |  |
| 74 | H |   | 3.31 | 28.58 | 28.47 |  |  |  |
| 75 | H |   | 3.15 | 28.82 | 28.66 |  |  |  |
| 76 | H | x | 6.01 | 25.63 | 25.68 |  |  |  |
| 77 | H |   | 2.53 | 29.28 | 29.17 |  |  |  |
| 78 | H |   | 2.53 | 29.24 | 29.15 |  |  |  |
| 79 | H |   | 4.09 | 27.78 | 27.72 |  |  |  |
| 80 | H |   | 1.2  | 30.45 | 30.42 |  |  |  |
| 81 | H |   | 1.2  | 30.68 | 30.63 |  |  |  |
| 82 | H |   | 1.2  | 30.67 | 30.67 |  |  |  |

|    | A                | B | C        | D        | E            | F        | G                 | H        |   |
|----|------------------|---|----------|----------|--------------|----------|-------------------|----------|---|
| 1  | Functional       |   | Solvent? |          | Basis Set    |          | Type of Data      |          |   |
| 2  | mPW1PW91         |   | PCII     |          | 6-311+G(d,p) |          | Shielding Tensors |          |   |
| 3  |                  |   |          |          |              |          |                   |          |   |
| 4  |                  |   | Isomer 1 | Isomer 2 | Isomer 3     | Isomer 4 | Isomer 5          | Isomer 6 |   |
| 5  | sDP4+ (H data)   |   | 0.01%    |          | 99.99%       | -        | -                 | -        | - |
| 6  | sDP4+ (C data)   |   | 74.88%   |          | 25.12%       | -        | -                 | -        | - |
| 7  | sDP4+ (all data) |   | 0.02%    |          | 99.98%       | -        | -                 | -        | - |
| 8  | uDP4+ (H data)   |   | 0.08%    |          | 99.92%       | -        | -                 | -        | - |
| 9  | uDP4+ (C data)   |   | 38.15%   |          | 61.85%       | -        | -                 | -        | - |
| 10 | uDP4+ (all data) |   | 0.05%    |          | 99.95%       | -        | -                 | -        | - |
| 11 | DP4+ (H data)    |   | 0.00%    |          | 100.00%      | -        | -                 | -        | - |
| 12 | DP4+ (C data)    |   | 64.77%   |          | 35.23%       | -        | -                 | -        | - |
| 13 | DP4+ (all data)  |   | 0.00%    |          | 100.00%      | -        | -                 | -        | - |

### S1.2. Computational details for compound 1 (ECD)

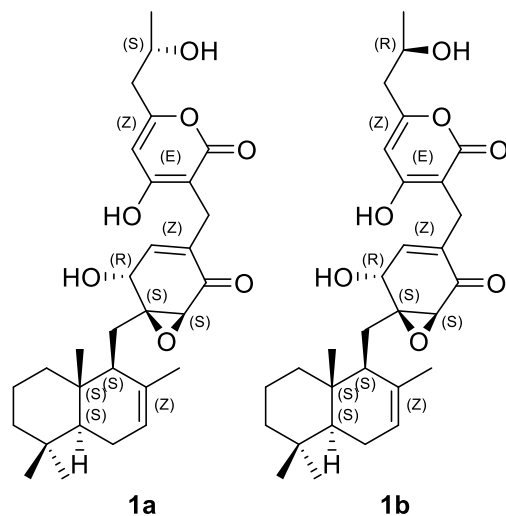

Conformation search based on molecular mechanics with MMFF force fields were performed for **1a** and **1b** gave 16 and 15 stable conformers with populations higher than 1%. All these conformers were further optimized by the density functional theory method at the B3LYP/6-31G(d) level by Gaussian 16 program package with g09 default keyword. The ECD were calculated using density functional theory (TDDFT) at B3LYP/6-311+G(d,p) level in methanol with IEFPCM model. The calculated ECD curves were all generated using SpecDis 1.71 program package and the calculated ECD data of all conformers were Boltzmann averaged by Gibbs free energy.

**Figure S4.** Comparison of the calculated ECD spectra for with the experimental spectrum of **1** in methanol with IEFPCM model.

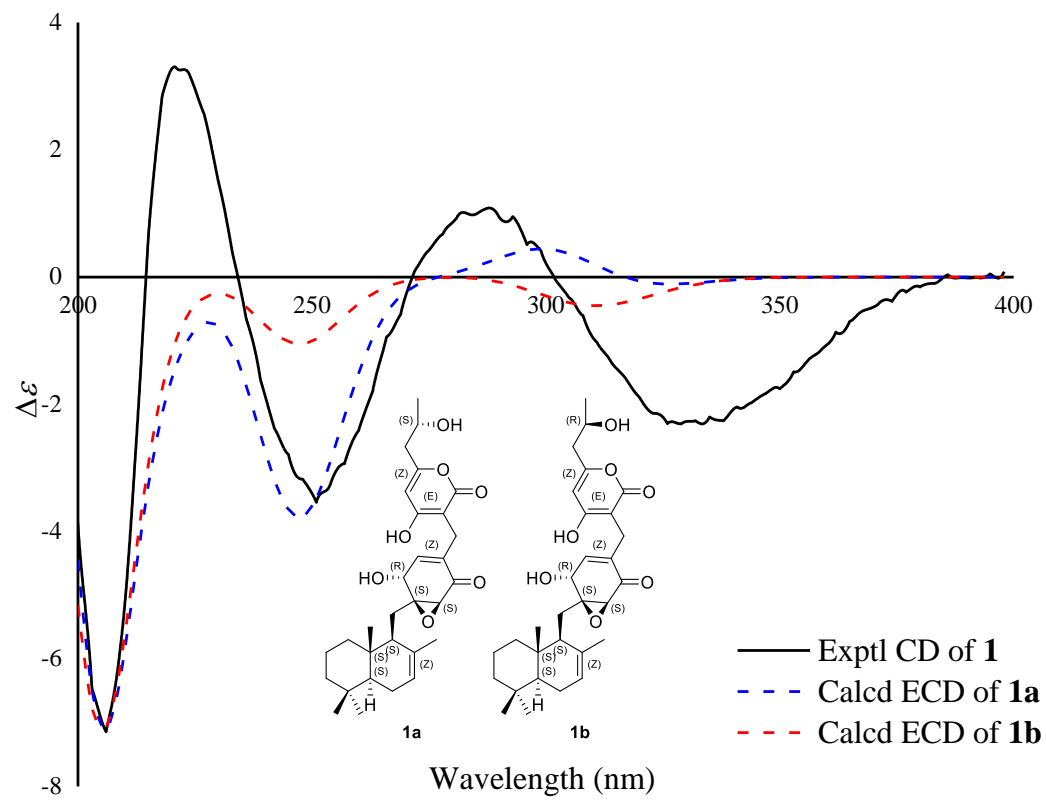

## Section S2. Computational details for **2**

### S2.1. Computational details for compound **2** (NMR)

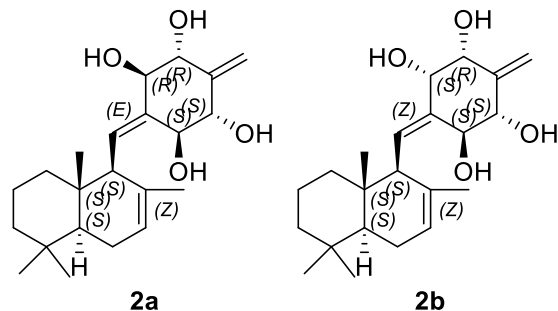

Conformation search based on molecular mechanics with MMFF force fields were performed for **2a** and **2b** gave 14 and 8 stable conformers with populations higher than 1%, respectively. All these conformers were further optimized by the density functional theory method at the B3LYP/6-31G(d) level by Gaussian 16 program package. Gauge Independent Atomic Orbital (GIAO) calculations of their  $^1\text{H}$  and  $^{13}\text{C}$  NMR chemical shifts using density functional theory (DFT) at the mPW1PW91/6-311+G(d,p) level with the PCM model in methanol. The calculated NMR data of these conformers were averaged according to the Boltzmann distribution theory and their relative Gibbs free energy. The  $^1\text{H}$  and  $^{13}\text{C}$  NMR chemical shifts for TMS were also calculated by the same procedures and used as the reference. After calculation, the experimental and calculated data were evaluated by the improved probability DP4+ method.

**Table S6.** Energy analysis for conformers of **2aA-2aN** at B3LYP/6-31G(d) level in the gas phase

| Species    | $E'=E+ZPE$   | $E$          | $H$          | $G$          | $\Delta G$ | $\Delta E(\text{kcal/mol})$ | $PE\%$ |
|------------|--------------|--------------|--------------|--------------|------------|-----------------------------|--------|
| <b>2aA</b> | -1159.111977 | -1159.085802 | -1159.084858 | -1159.165761 | 0          | 0                           | 23.98% |
| <b>2aB</b> | -1159.111569 | -1159.085503 | -1159.084559 | -1159.164837 | 0.000924   | 0.579819                    | 9.01%  |
| <b>2aC</b> | -1159.110888 | -1159.084671 | -1159.083727 | -1159.164523 | 0.001238   | 0.776857                    | 6.46%  |
| <b>2aD</b> | -1159.111625 | -1159.085559 | -1159.084615 | -1159.164709 | 0.001052   | 0.660140                    | 7.86%  |
| <b>2aE</b> | -1159.110705 | -1159.084474 | -1159.083530 | -1159.164350 | 0.001411   | 0.885416                    | 5.38%  |
| <b>2aF</b> | -1159.110283 | -1159.083989 | -1159.083045 | -1159.164020 | 0.001741   | 1.092494                    | 3.79%  |
| <b>2aG</b> | -1159.111364 | -1159.085099 | -1159.084155 | -1159.165216 | 0.000545   | 0.341993                    | 13.46% |
| <b>2aH</b> | -1159.111165 | -1159.085026 | -1159.084082 | -1159.164441 | 0.001320   | 0.828313                    | 5.92%  |
| <b>2aI</b> | -1159.111078 | -1159.084871 | -1159.083927 | -1159.164630 | 0.001131   | 0.709713                    | 7.23%  |
| <b>2aJ</b> | -1159.110582 | -1159.084349 | -1159.083405 | -1159.163987 | 0.001774   | 1.113202                    | 3.66%  |
| <b>2aK</b> | -1159.109497 | -1159.083183 | -1159.082239 | -1159.163310 | 0.002451   | 1.538026                    | 1.79%  |
| <b>2aL</b> | -1159.110156 | -1159.083813 | -1159.082868 | -1159.164123 | 0.001638   | 1.027861                    | 4.23%  |
| <b>2aM</b> | -1159.110719 | -1159.084545 | -1159.083600 | -1159.163991 | 0.001770   | 1.110692                    | 3.67%  |
| <b>2aN</b> | -1159.110770 | -1159.084613 | -1159.083669 | -1159.163966 | 0.001795   | 1.126380                    | 3.58%  |

$E$ ,  $E'$ ,  $H$ ,  $G$ : total energy, total energy with zero point energy (ZPE), enthalpy, and Gibbs free energy.

**Figure S5.** Main conformers of **2a** in NMR calculation.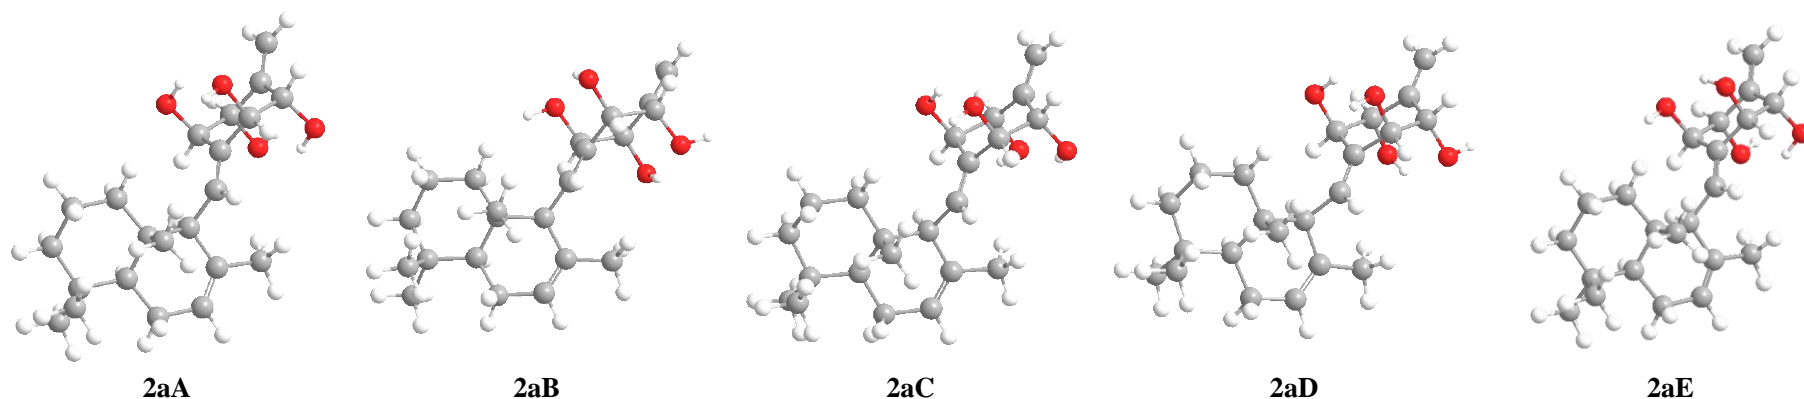

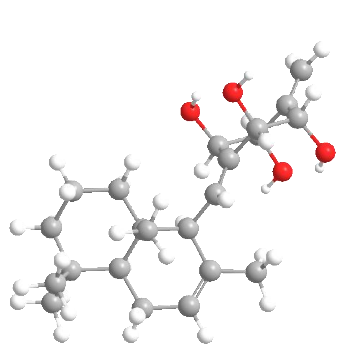

**2aF**

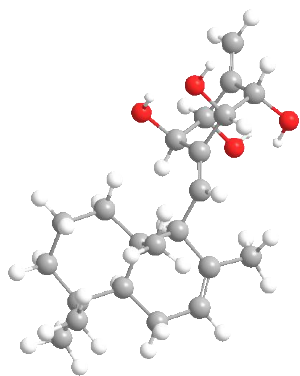

**2aG**

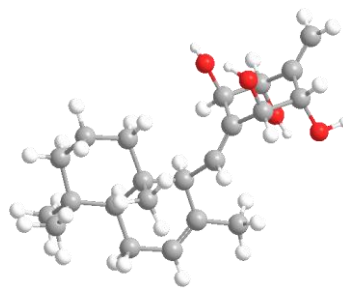

**2aH**

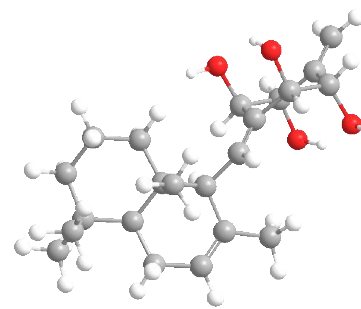

**2aI**

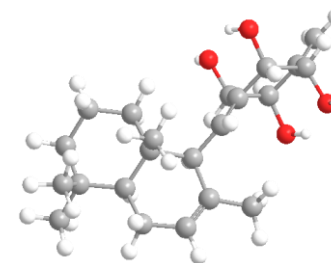

**2aJ**

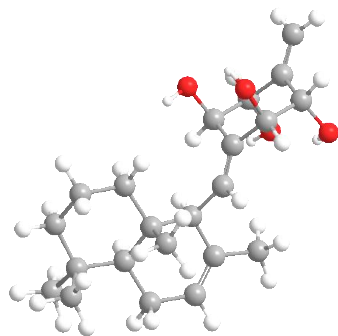

**2aK**

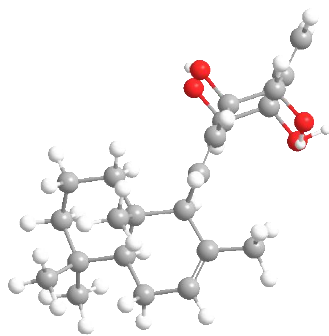

**2aL**

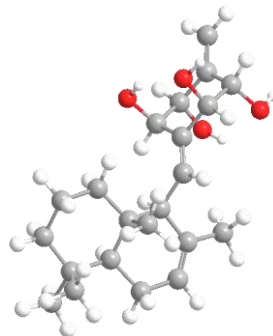

**2aM**

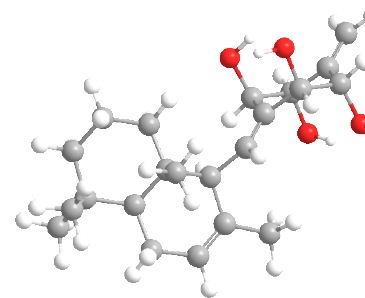

**2aN**



**Table S7.** Energy analysis for conformers of **2bA-2bH** at B3LYP/6-31G(d) level in the gas phase

| Species    | $E'=E+ZPE$   | $E$          | $H$          | $G$          | $\Delta G$ | $\Delta E(\text{kcal/mol})$ | $PE\%$ |
|------------|--------------|--------------|--------------|--------------|------------|-----------------------------|--------|
| <b>2bA</b> | -1159.108969 | -1159.082410 | -1159.081465 | -1159.163156 | 0.002061   | 1.293297                    | 3.57%  |
| <b>2bB</b> | -1159.110681 | -1159.084036 | -1159.083091 | -1159.165217 | 0          | 0                           | 31.74% |
| <b>2bC</b> | -1159.110835 | -1159.084465 | -1159.083521 | -1159.164732 | 0.000485   | 0.304342                    | 18.98% |
| <b>2bD</b> | -1159.110565 | -1159.084035 | -1159.083091 | -1159.164609 | 0.000608   | 0.381526                    | 16.66% |
| <b>2bE</b> | -1159.108984 | -1159.082485 | -1159.081541 | -1159.163312 | 0.001905   | 1.195406                    | 4.22%  |
| <b>2bF</b> | -1159.109316 | -1159.082842 | -1159.081897 | -1159.163699 | 0.001518   | 0.952559                    | 6.35%  |
| <b>2bG</b> | -1159.110569 | -1159.084036 | -1159.083092 | -1159.164624 | 0.000593   | 0.372113                    | 16.93% |
| <b>2bH</b> | -1159.108756 | -1159.082549 | -1159.081605 | -1159.162362 | 0.002855   | 1.791540                    | 1.54%  |

$E$ ,  $E'$ ,  $H$ ,  $G$ : total energy, total energy with zero point energy (ZPE), enthalpy, and Gibbs free energy.

**Figure S6.** Main conformers of **2b** in NMR and ECD calculations.

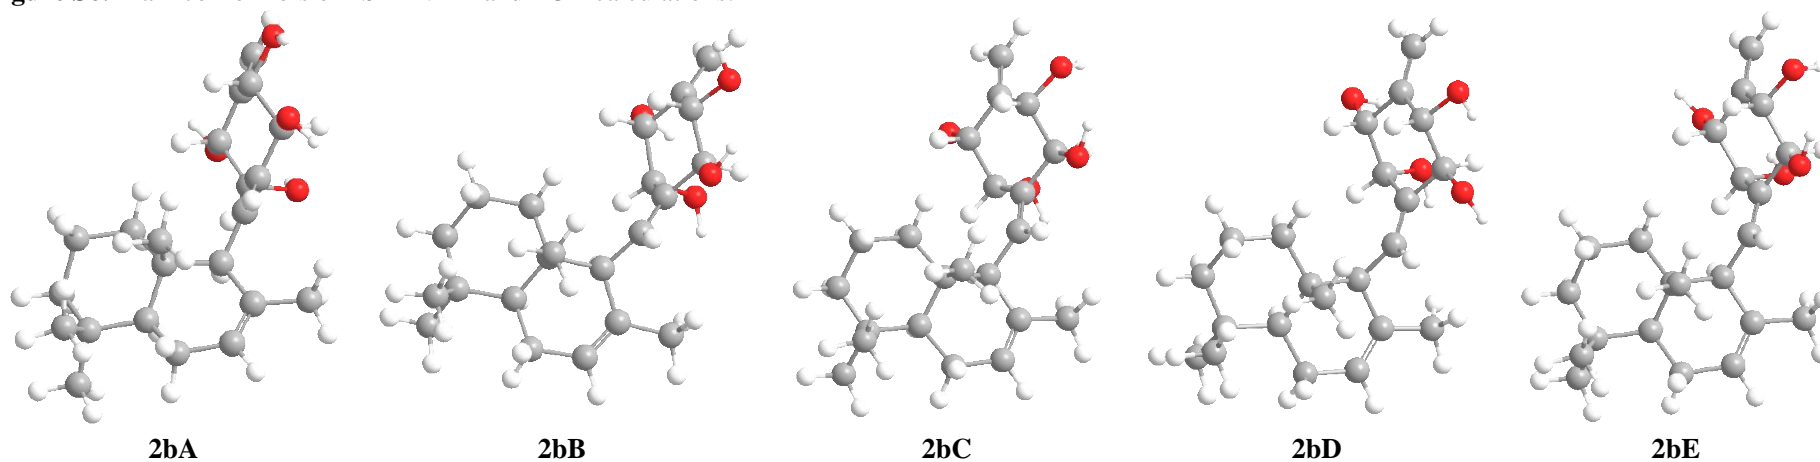

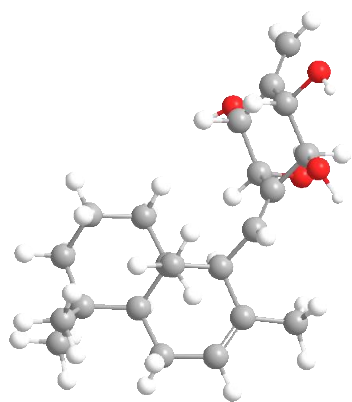

**2bF**

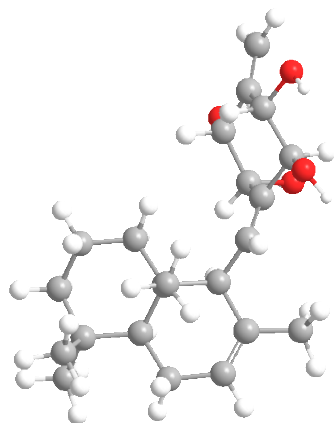

**2bG**

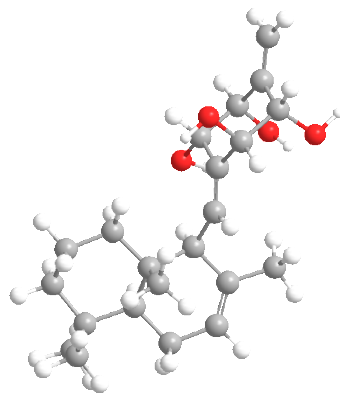

**2bH**

**Table S8.** DP4+ analysis results of **2a** (Isomer 1) and **2b** (Isomer 2)

|    | A          | B    | C            | D        | E            | F        | G                 | H        |
|----|------------|------|--------------|----------|--------------|----------|-------------------|----------|
| 1  | Functional |      | Solvent?     |          | Basis Set    |          | Type of Data      |          |
| 2  | mPW1PW91   |      | PCM          |          | 6-311+G(d,p) |          | Shielding Tensors |          |
| 3  |            |      |              |          |              |          |                   |          |
| 12 |            |      | DP4+         | 0.00%    | 100.00%      | -        | -                 | -        |
| 14 | Nuclei     | sp2? | Experimental | Isomer 1 | Isomer 2     | Isomer 3 | Isomer 4          | Isomer 5 |
| 15 | C          |      | 40.4         | 144.9    | 144.8        |          |                   |          |
| 16 | C          |      | 18.3         | 165.5    | 165.5        |          |                   |          |
| 17 | C          |      | 42.1         | 143.7    | 143.8        |          |                   |          |
| 18 | C          |      | 37.2         | 149.3    | 149.4        |          |                   |          |
| 19 | C          |      | 49.9         | 134.7    | 134.9        |          |                   |          |
| 20 | C          |      | 23.4         | 160.6    | 160.4        |          |                   |          |
| 21 | C          | x    | 121.2        | 56.5     | 56.4         |          |                   |          |
| 22 | C          | x    | 133.5        | 44.1     | 43.8         |          |                   |          |
| 23 | C          |      | 52.9         | 129.7    | 130.3        |          |                   |          |
| 24 | C          |      | 36.7         | 145.3    | 144.8        |          |                   |          |
| 25 | C          |      | 32.4         | 164.8    | 164.9        |          |                   |          |
| 26 | C          |      | 21           | 153.9    | 154.0        |          |                   |          |
| 27 | C          |      | 13.5         | 162.1    | 162.0        |          |                   |          |
| 28 | C          |      | 21.4         | 171.6    | 171.5        |          |                   |          |
| 29 | C          | x    | 125.6        | 37.2     | 48.7         |          |                   |          |
| 30 | C          | x    | 137.6        | 44.8     | 42.9         |          |                   |          |
| 31 | C          |      | 69           | 101.8    | 108.7        |          |                   |          |
| 32 | C          |      | 71.6         | 105.7    | 107.9        |          |                   |          |
| 33 | C          | x    | 146.6        | 34.4     | 29.2         |          |                   |          |
| 34 | C          |      | 75.3         | 104.6    | 111.8        |          |                   |          |
| 35 | C          |      | 73.5         | 112.5    | 114.6        |          |                   |          |
| 36 | C          | x    | 105.8        | 58.3     | 75.1         |          |                   |          |
| 37 |            |      |              |          |              |          |                   |          |
| 38 | H          |      | 1.5          | 30.08    | 30.30        |          |                   |          |
| 39 | H          |      | 1            | 30.58    | 30.74        |          |                   |          |
| 40 | H          |      | 1.54         | 30.16    | 30.15        |          |                   |          |
| 41 | H          |      | 1.4          | 30.39    | 30.41        |          |                   |          |
| 42 | H          |      | 1.45         | 30.35    | 30.36        |          |                   |          |
| 43 | H          |      | 1.21         | 30.48    | 30.48        |          |                   |          |
| 44 | H          |      | 1.29         | 30.43    | 30.46        |          |                   |          |
| 45 | H          |      | 2.04         | 29.73    | 29.70        |          |                   |          |
| 46 | H          |      | 1.93         | 29.68    | 29.68        |          |                   |          |
| 47 | H          | x    | 5.5          | 25.72    | 25.76        |          |                   |          |
| 48 | H          |      | 2.8          | 28.75    | 28.79        |          |                   |          |
| 49 | H          |      | 0.89         | 30.35    | 30.39        |          |                   |          |
| 50 | H          |      | 0.89         | 31.33    | 31.32        |          |                   |          |
| 51 | H          |      | 0.89         | 30.69    | 30.71        |          |                   |          |

|    |   |   |      |       |       |  |  |  |
|----|---|---|------|-------|-------|--|--|--|
| 52 | H |   | 0.93 | 31.03 | 31.04 |  |  |  |
| 53 | H |   | 0.93 | 31.19 | 31.19 |  |  |  |
| 54 | H |   | 0.93 | 30.42 | 30.41 |  |  |  |
| 55 | H |   | 0.9  | 30.22 | 30.24 |  |  |  |
| 56 | H |   | 0.9  | 30.16 | 30.11 |  |  |  |
| 57 | H |   | 0.9  | 30.18 | 30.23 |  |  |  |
| 58 | H |   | 1.52 | 31.06 | 30.57 |  |  |  |
| 59 | H |   | 1.52 | 30.75 | 30.84 |  |  |  |
| 60 | H |   | 1.52 | 30.55 | 31.11 |  |  |  |
| 61 | H | x | 5.68 | 25.61 | 25.63 |  |  |  |
| 62 | H |   | 4.77 | 27.47 | 27.47 |  |  |  |
| 63 | H |   | 3.99 | 27.45 | 27.90 |  |  |  |
| 64 | H |   | 3.61 | 27.36 | 27.61 |  |  |  |
| 65 | H |   | 4.11 | 26.94 | 26.88 |  |  |  |
| 66 | H | x | 5.39 | 25.93 | 26.01 |  |  |  |
| 67 | H | x | 5.28 | 25.93 | 26.06 |  |  |  |

|    | A                | B | C        | D        | E            | F        | G                 | H        |
|----|------------------|---|----------|----------|--------------|----------|-------------------|----------|
| 1  | Functional       |   | Solvent? |          | Basis Set    |          | Type of Data      |          |
| 2  | mPVP91           |   | PCP      |          | 6-311+G(d,p) |          | Shielding Tensors |          |
| 3  |                  |   |          |          |              |          |                   |          |
| 4  |                  |   | Isomer 1 | Isomer 2 | Isomer 3     | Isomer 4 | Isomer 5          | Isomer 6 |
| 5  | sDP4+ (H data)   |   | 92.04%   | 7.96%    | –            | –        | –                 | –        |
| 6  | sDP4+ (C data)   |   | 0.00%    | 100.00%  | –            | –        | –                 | –        |
| 7  | sDP4+ (all data) |   | 0.00%    | 100.00%  | –            | –        | –                 | –        |
| 8  | uDP4+ (H data)   |   | 0.06%    | 99.94%   | –            | –        | –                 | –        |
| 9  | uDP4+ (C data)   |   | 0.00%    | 100.00%  | –            | –        | –                 | –        |
| 10 | uDP4+ (all data) |   | 0.00%    | 100.00%  | –            | –        | –                 | –        |
| 11 | DP4+ (H data)    |   | 0.73%    | 99.27%   | –            | –        | –                 | –        |
| 12 | DP4+ (C data)    |   | 0.00%    | 100.00%  | –            | –        | –                 | –        |
| 13 | DP4+ (all data)  |   | 0.00%    | 100.00%  | –            | –        | –                 | –        |

## S2.2. Computational details for compound 2 (ECD)

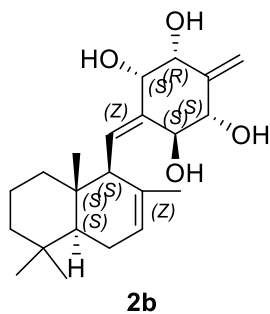

Conformation search based on molecular mechanics with MMFF force fields were performed for **2b** gave 8 stable conformers with populations higher than 1%. All these conformers were further optimized by the density functional theory method at the B3LYP/6-31G(d) level by Gaussian 16 program package. The ECD were calculated using density functional theory (TDDFT) at B3LYP/6-311+G(d,p) level in methanol with IEFPCM model. The calculated ECD curves were all generated using SpecDis 1.71 program package and the calculated ECD data of all conformers were Boltzmann averaged by Gibbs free energy.

**Figure S7.** Comparison of the calculated ECD spectra for with the experimental spectrum of **2** in methanol with IEFPCM model.

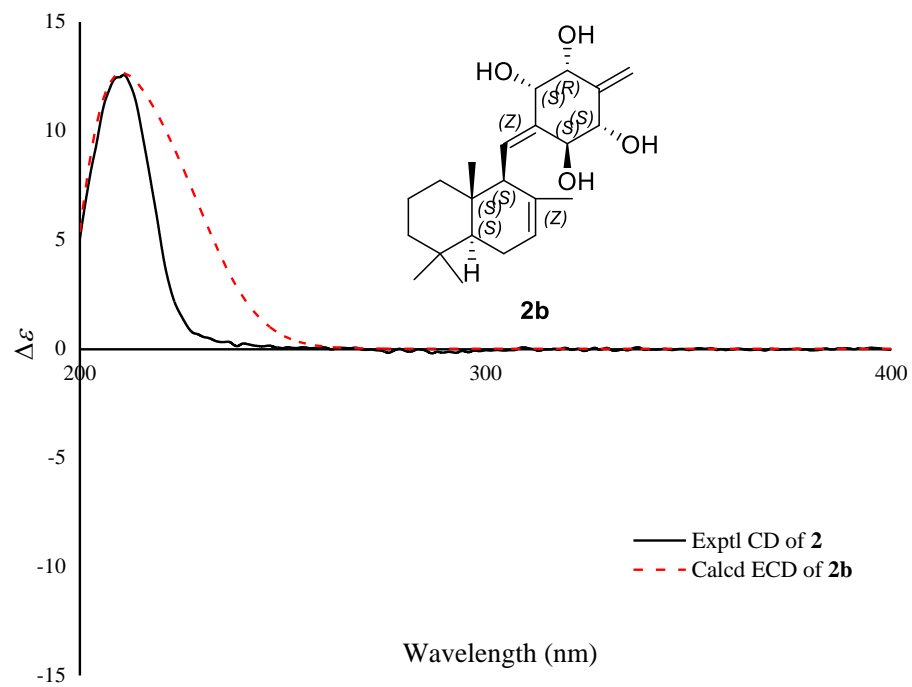

## Section S3. NMR and MS spectra of **1**

**Figure S8.**  $^1\text{H}$  NMR of **1** in  $\text{CD}_3\text{OD}$

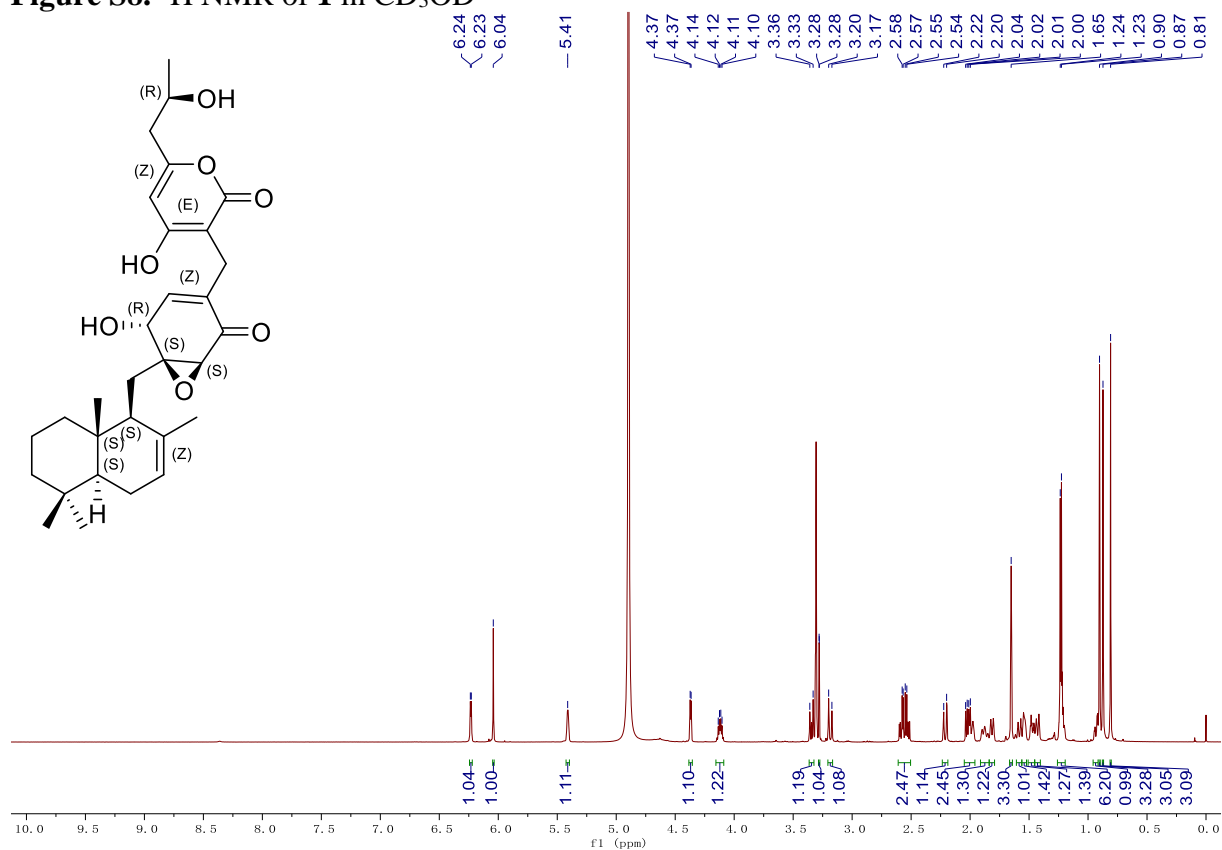

**Figure S9.**  $^{13}\text{C}$  NMR and DEPT of **1** in  $\text{CD}_3\text{OD}$

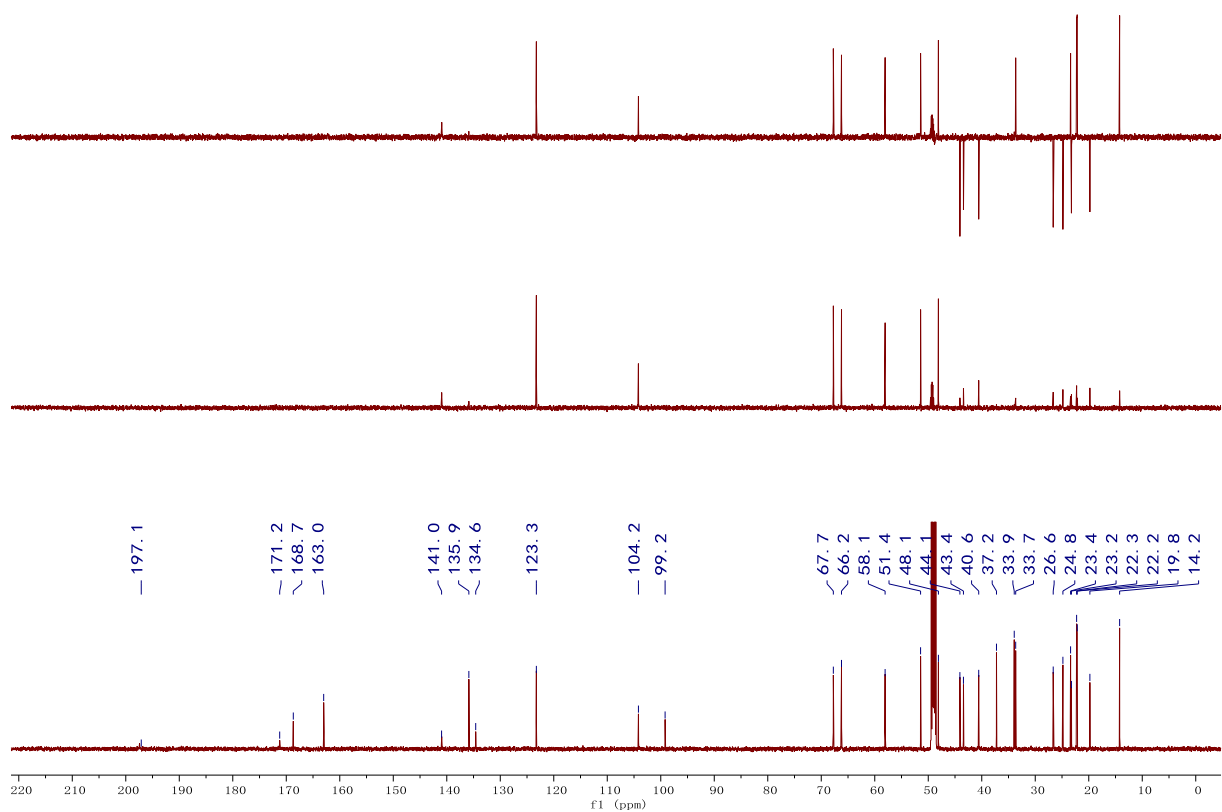

**Figure S10.** HSQC of **1** in CD<sub>3</sub>OD

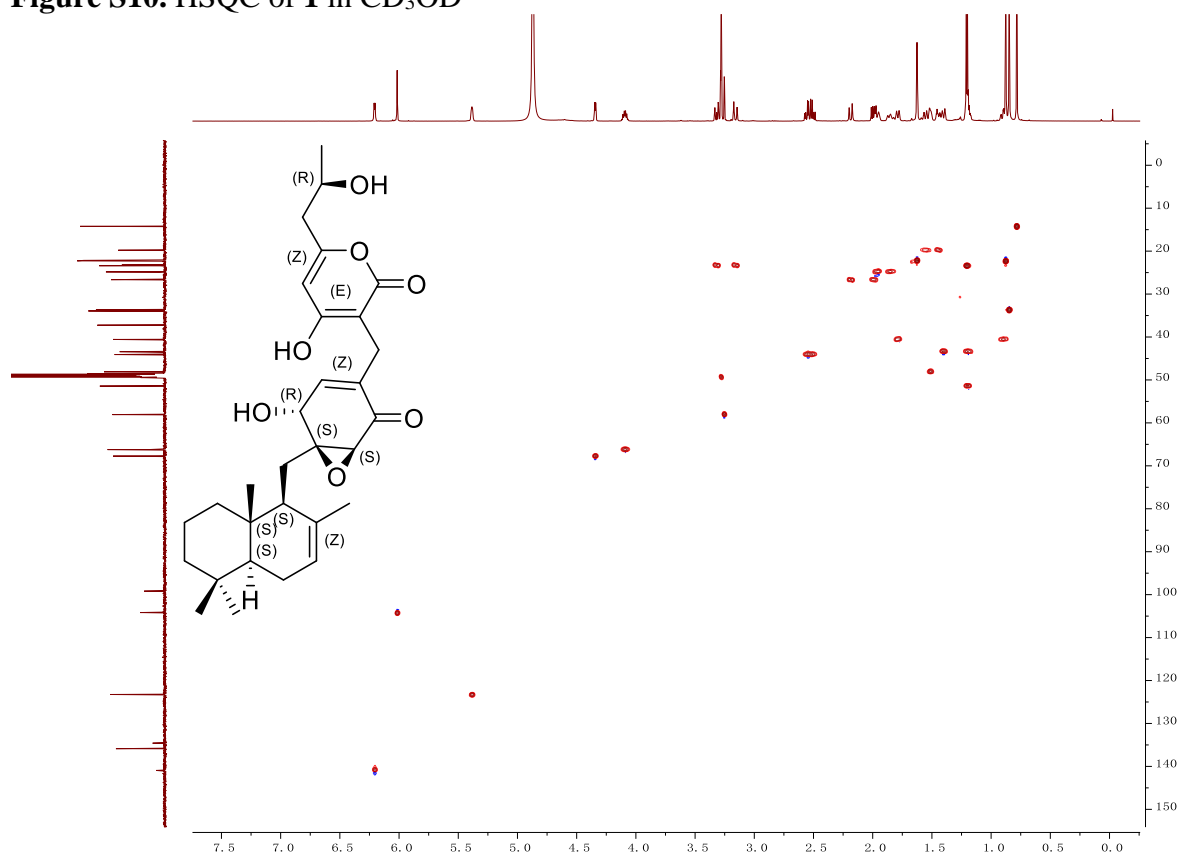

**Figure S11.** HMBC of **1** in CD<sub>3</sub>OD

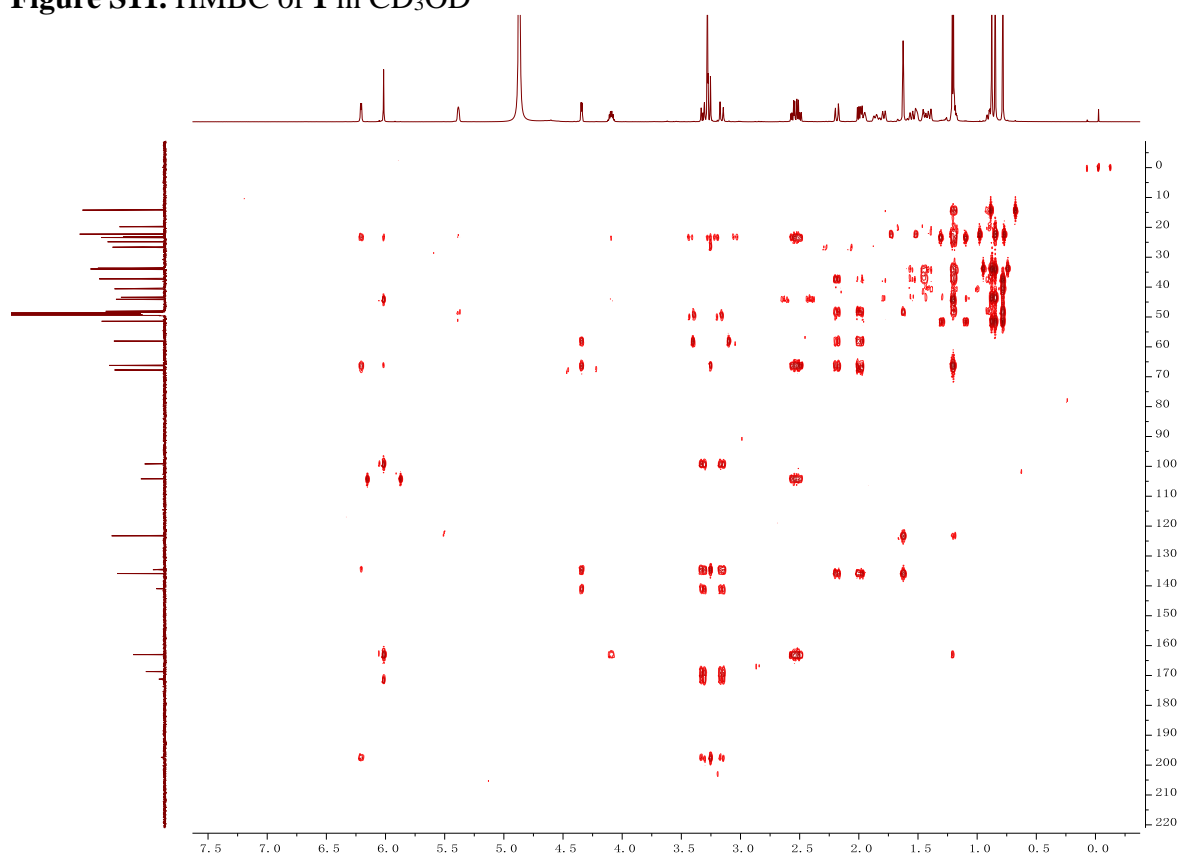



**Figure S12.**  $^1\text{H}$ - $^1\text{H}$  COSY of **1** in  $\text{CD}_3\text{OD}$

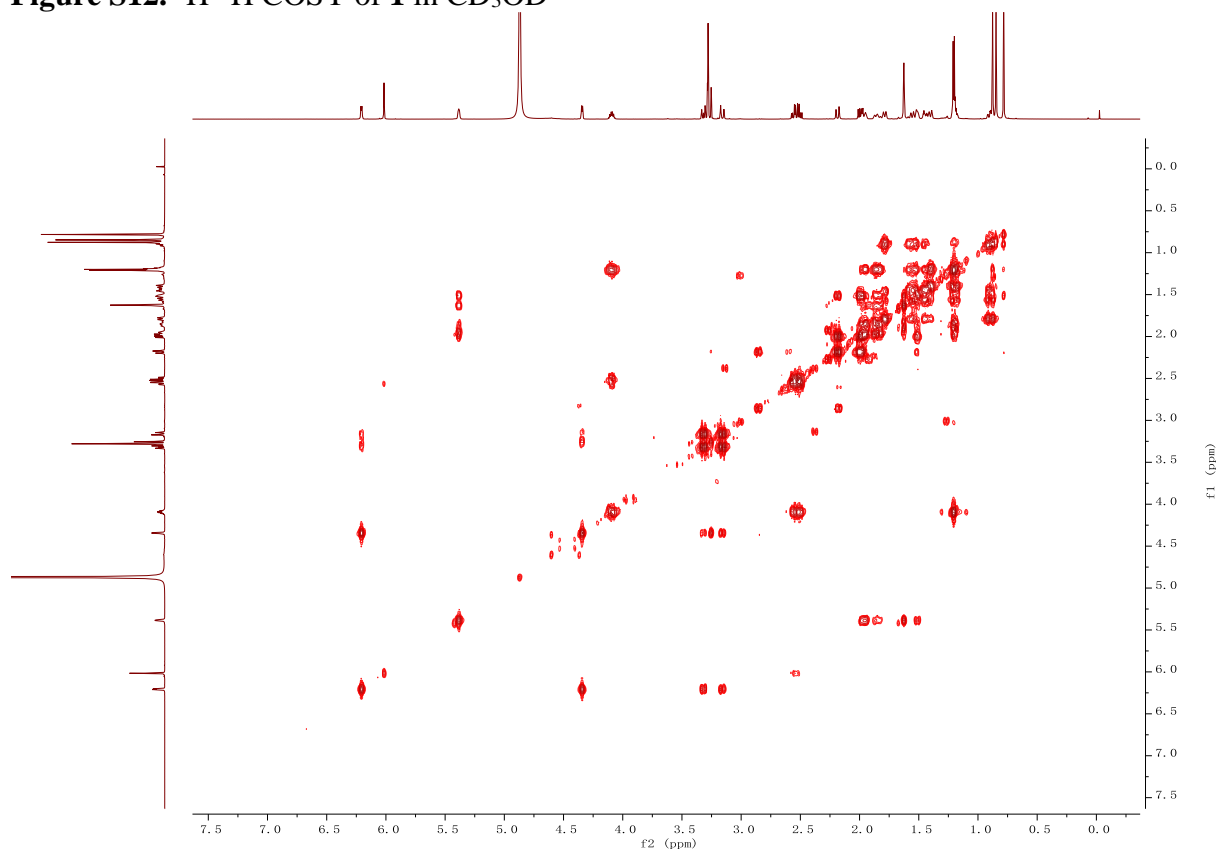

**Figure S13.** ROESY of **1** in  $\text{CD}_3\text{OD}$

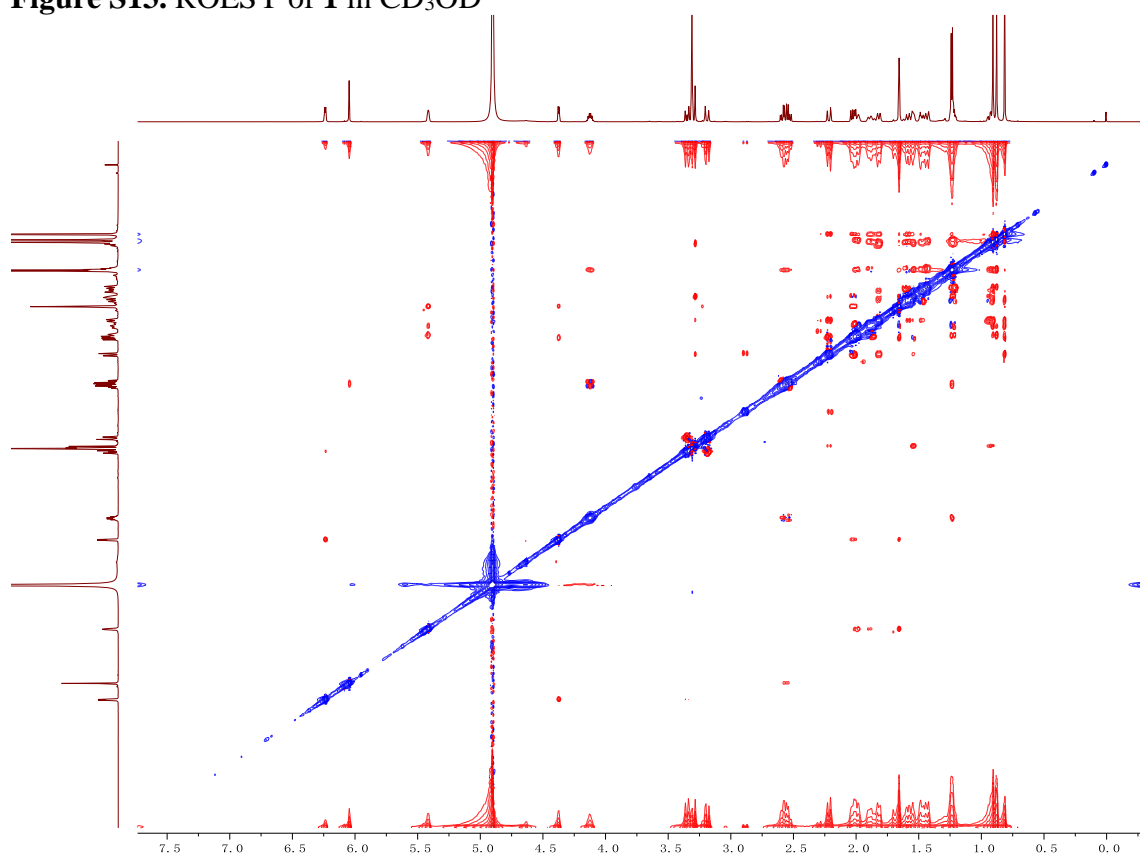

**Figure S14. HRESIMS of 1**

FTMS + p ESI Full lock ms [150.0000-1100.0000]

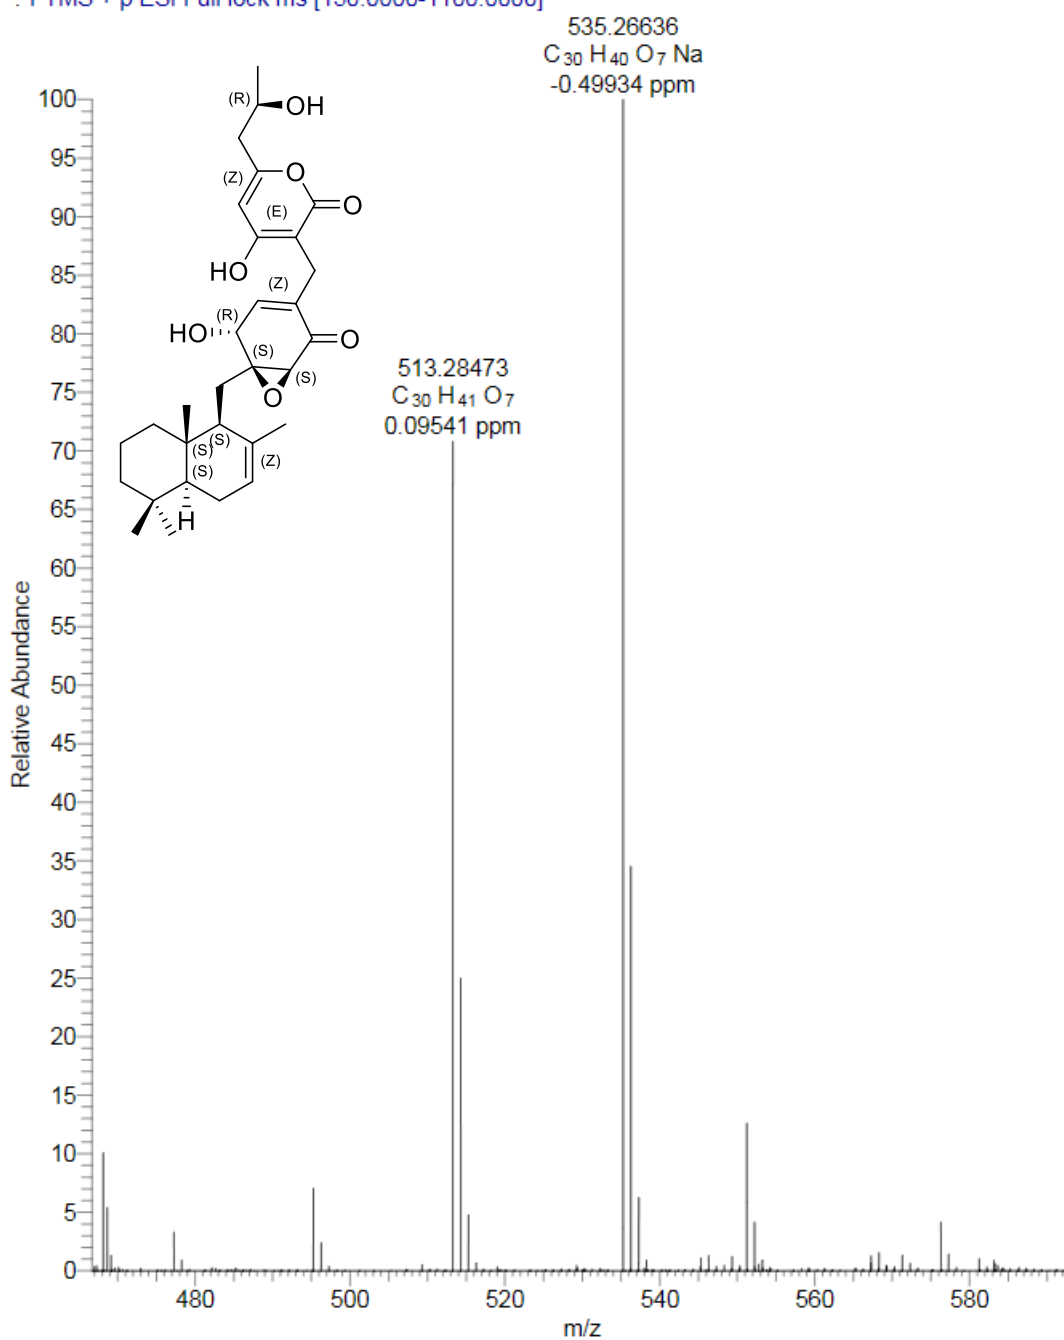

**Figure S15.** UV of **1**

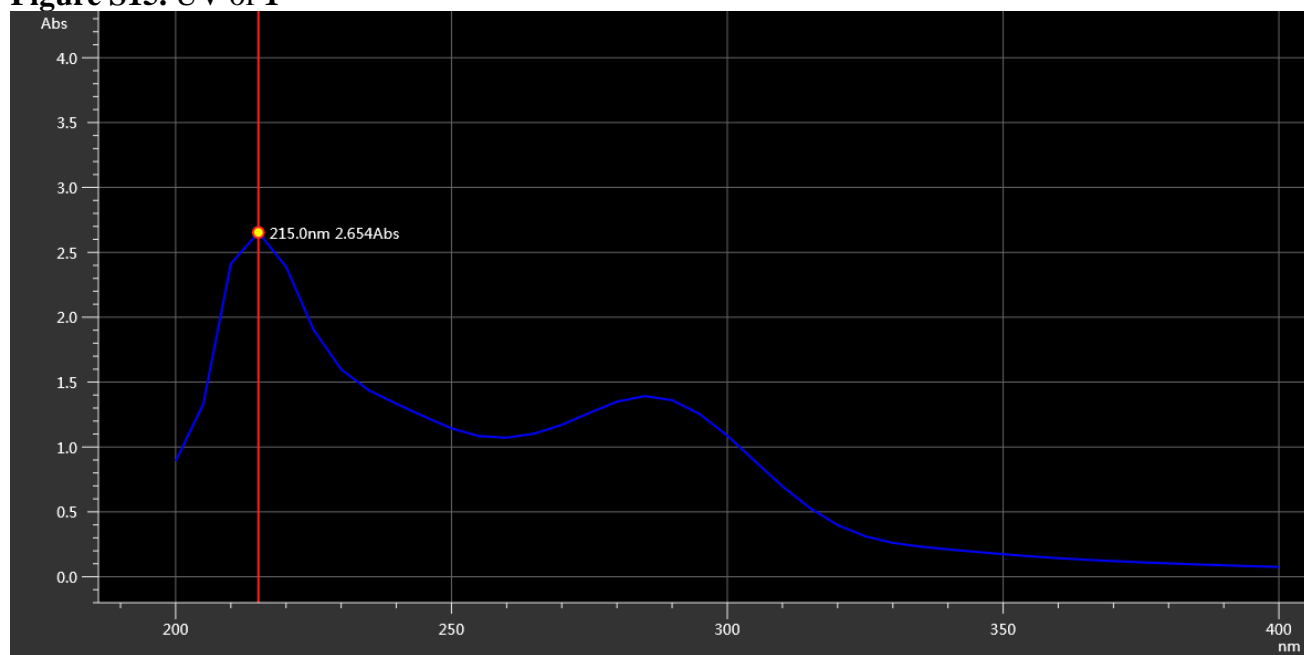

**Figure S16.** IR of **1**

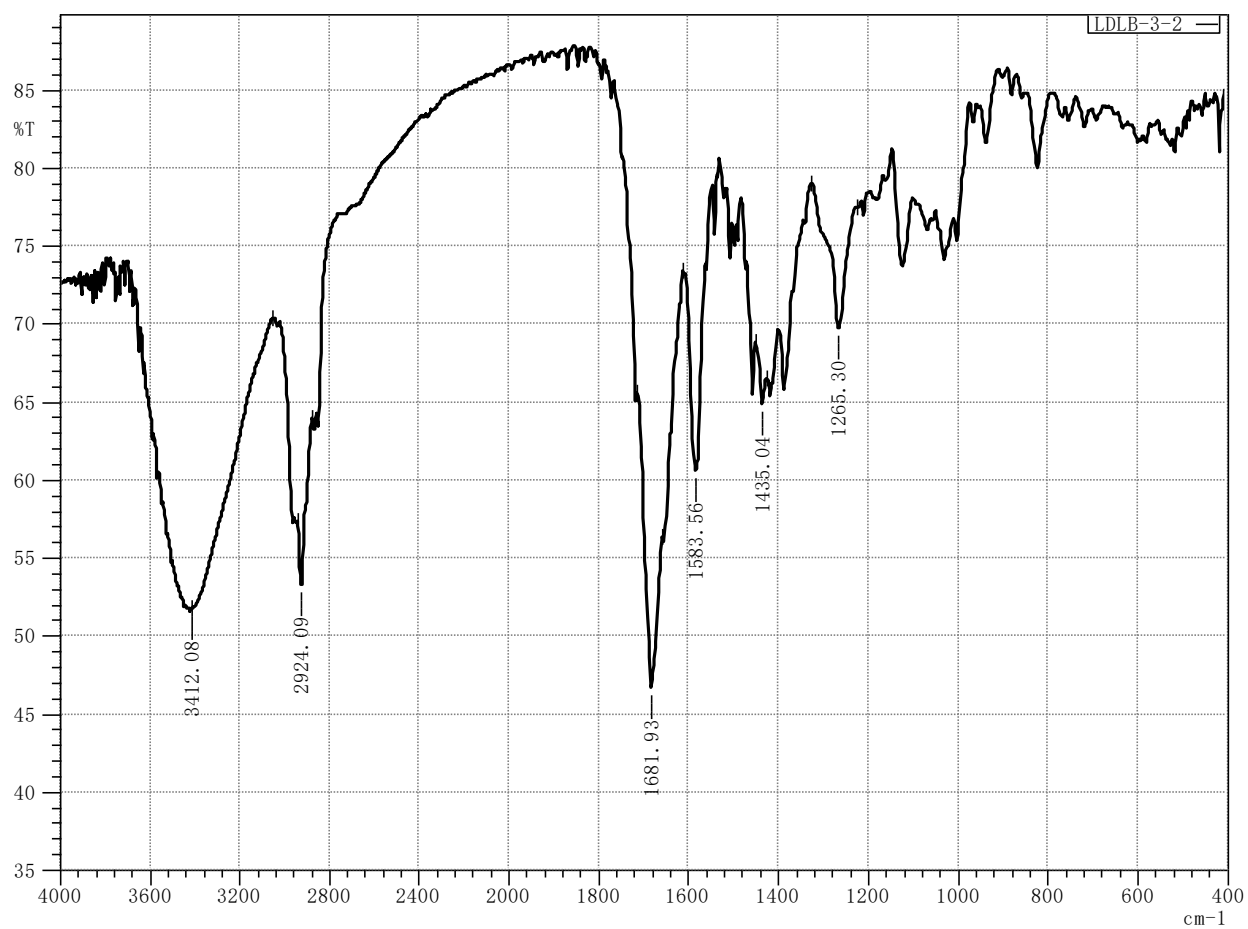

## Section S4. NMR and MS spectra of **2**

**Figure S17.**  $^1\text{H}$  NMR of **2** in  $\text{CD}_3\text{OD}$

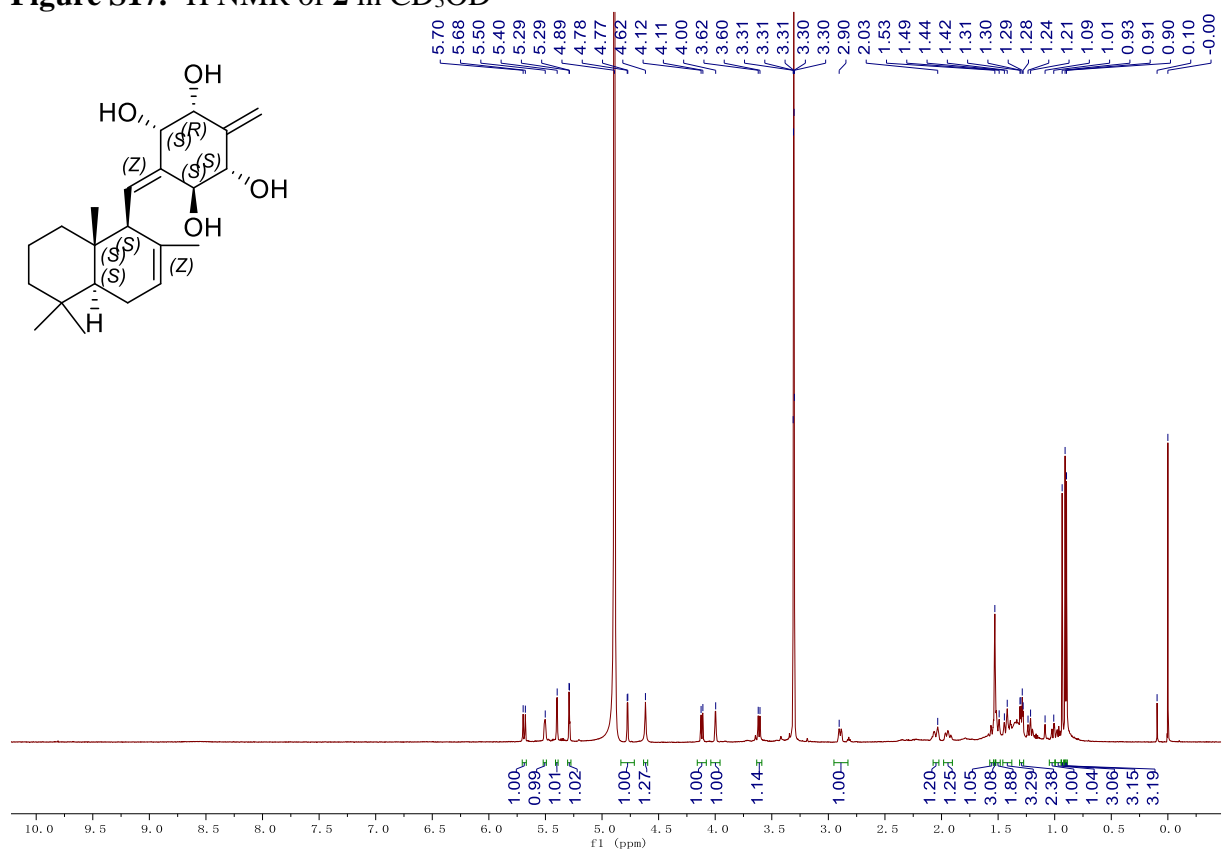

**Figure S18.**  $^{13}\text{C}$  NMR and DEPT of **2** in  $\text{CD}_3\text{OD}$

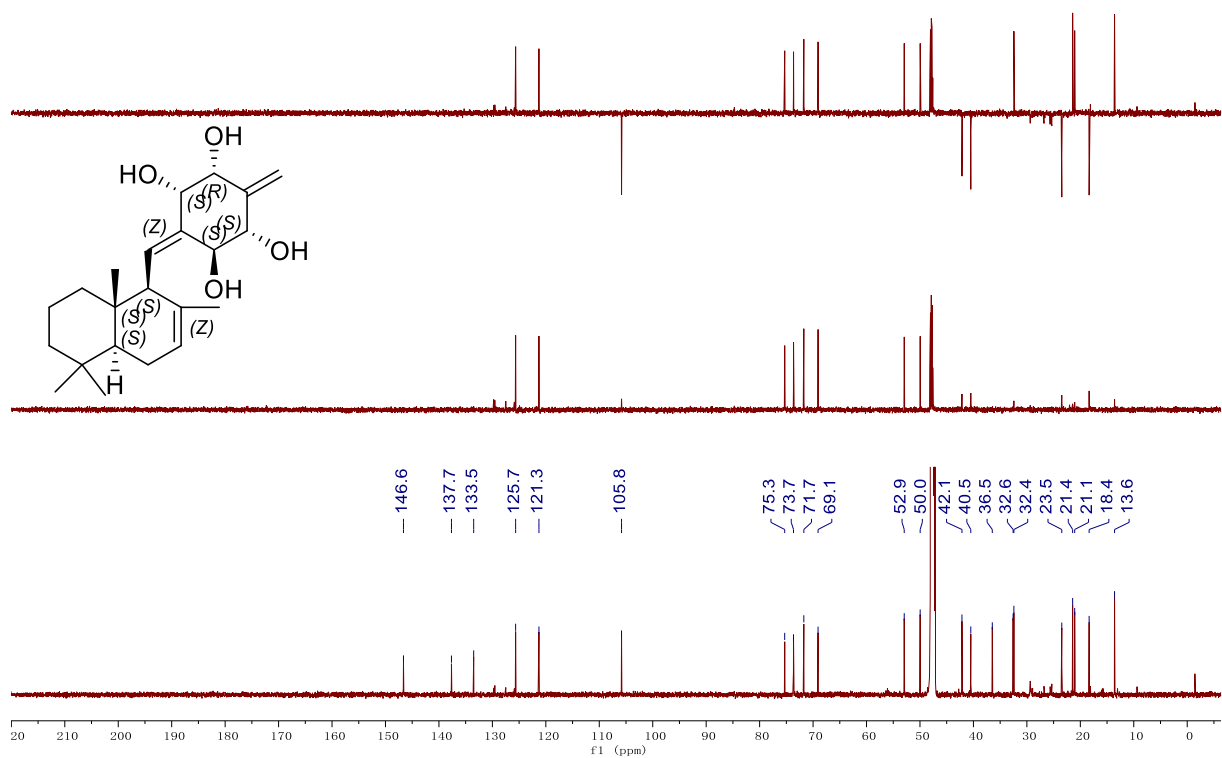

**Figure S19.** HSQC of **2** in CD<sub>3</sub>OD

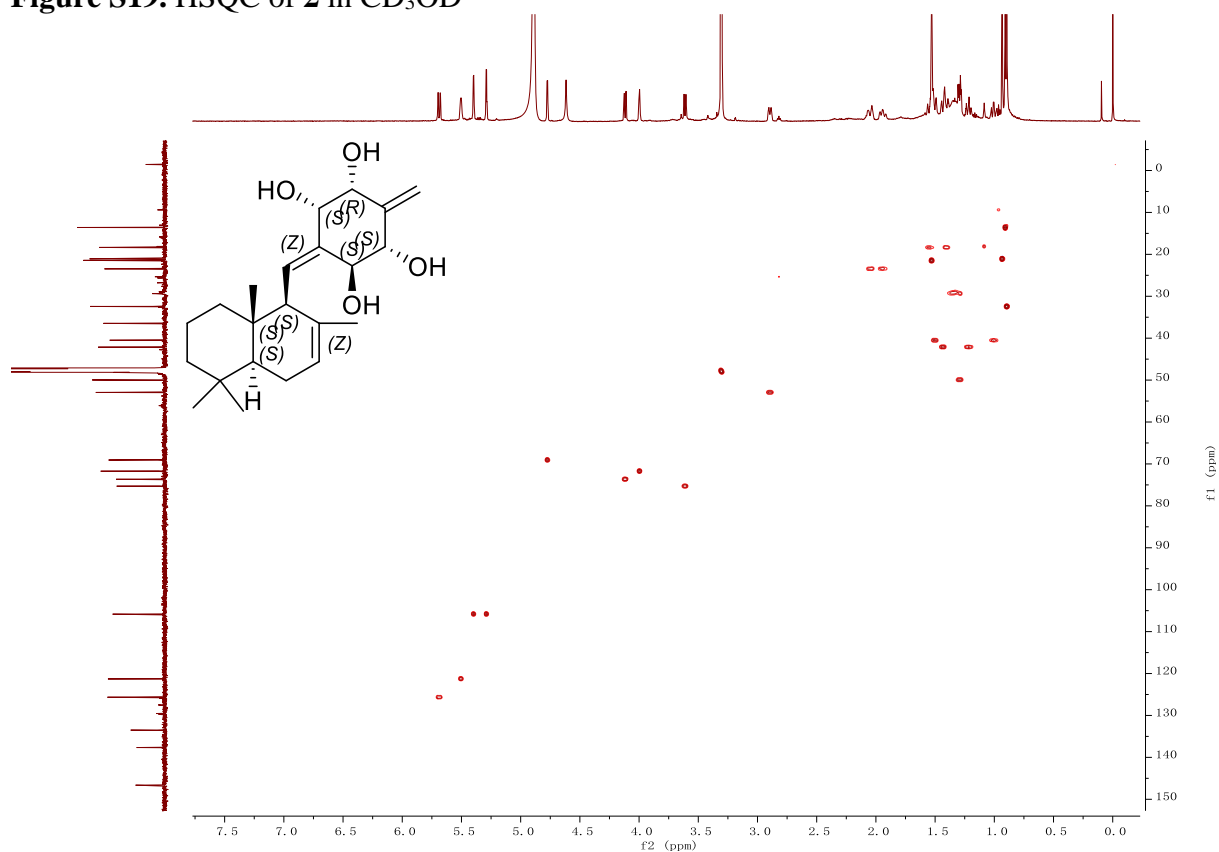

**Figure S20.** HMBC of **2** in CD<sub>3</sub>OD

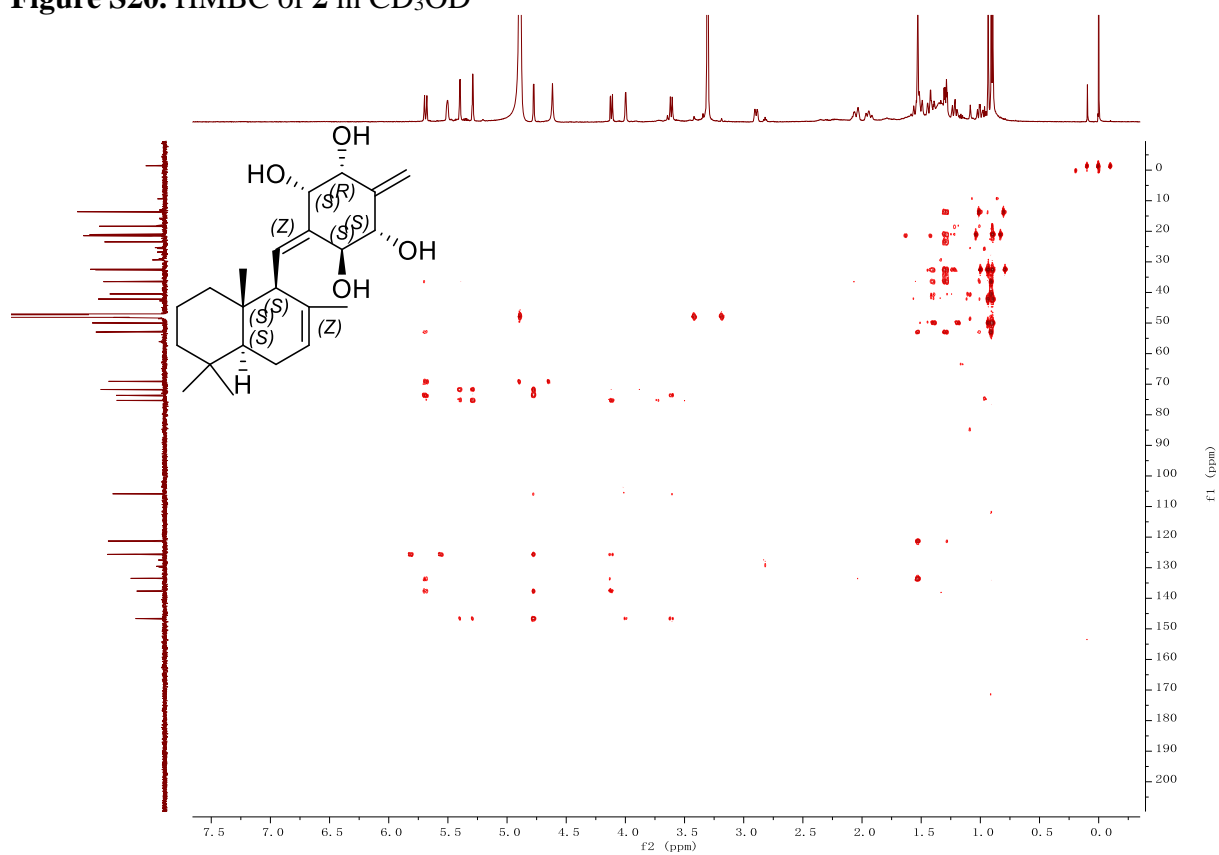

**Figure S21.**  $^1\text{H}$ - $^1\text{H}$  COSY of **2** in  $\text{CD}_3\text{OD}$

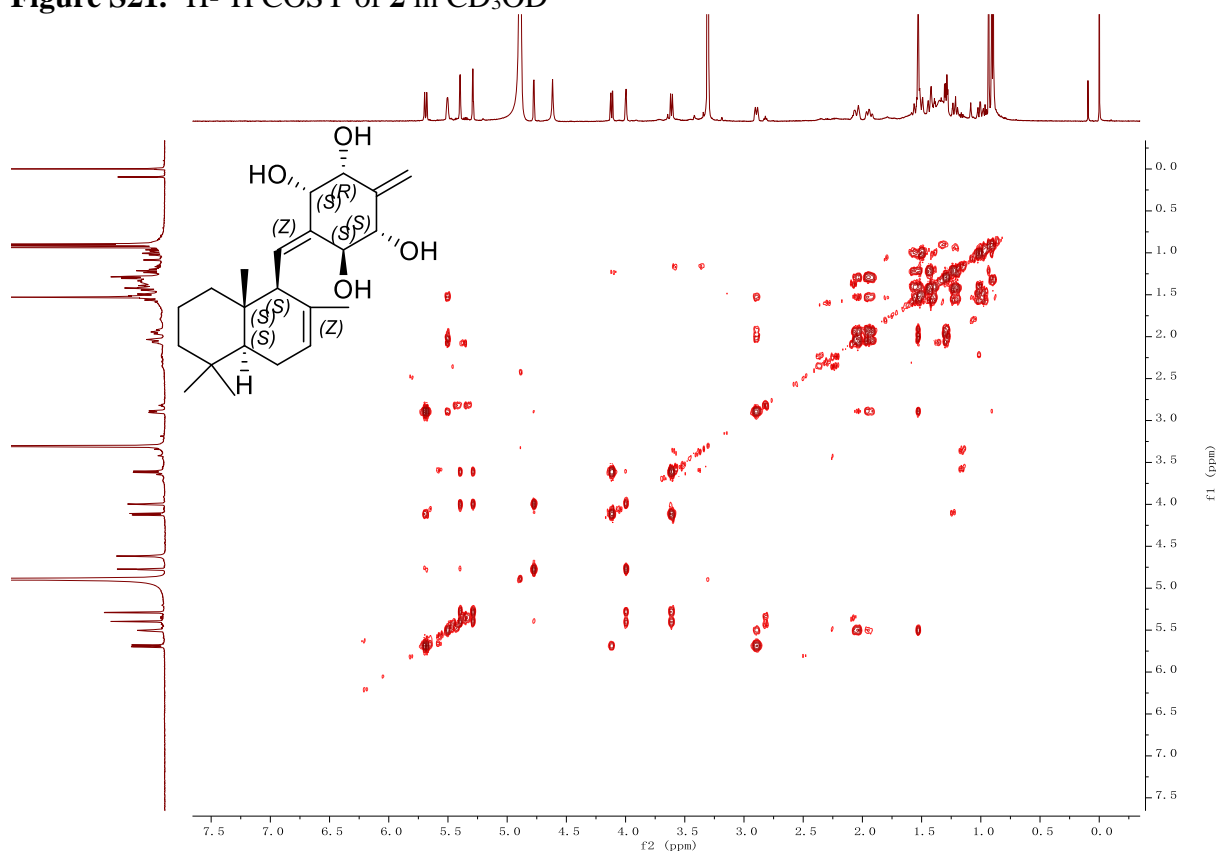

**Figure S22.** ROESY of **2** in  $\text{CD}_3\text{OD}$

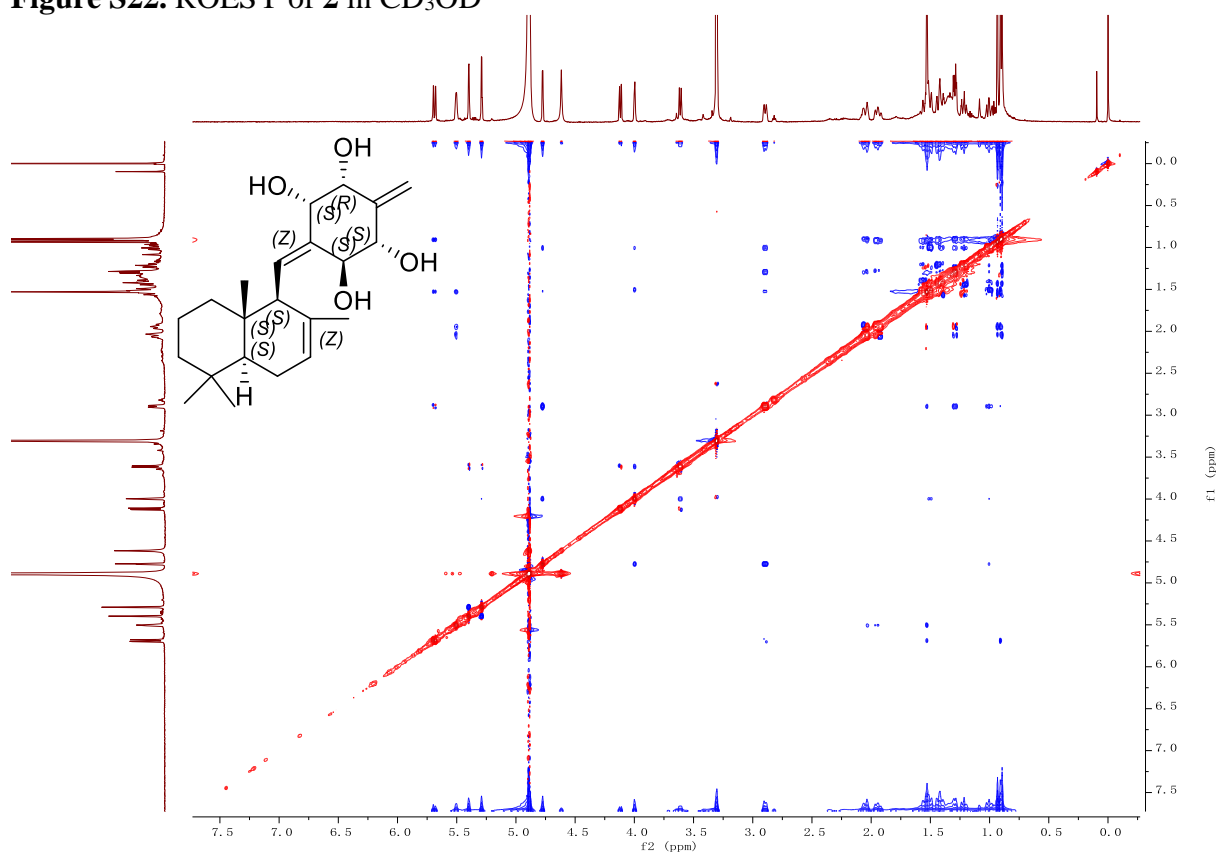

T: FTMS + p ESI Full lock ms [150.0000-1100.0000]

385.23468  
C<sub>22</sub> H<sub>34</sub> O<sub>4</sub> Na  
-0.64164 ppm

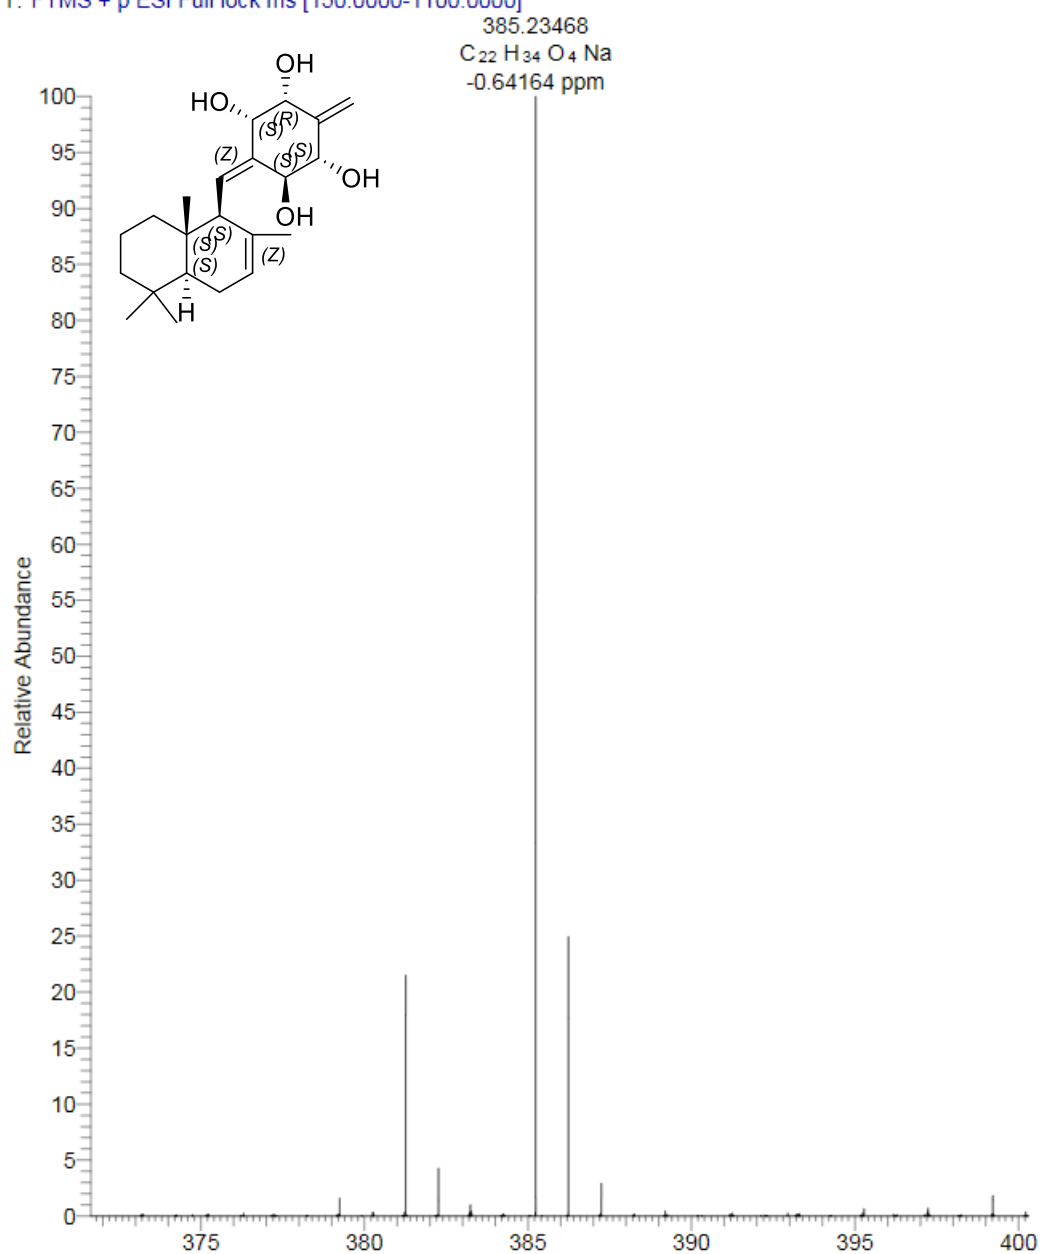



**Figure S24.** UV of **2**

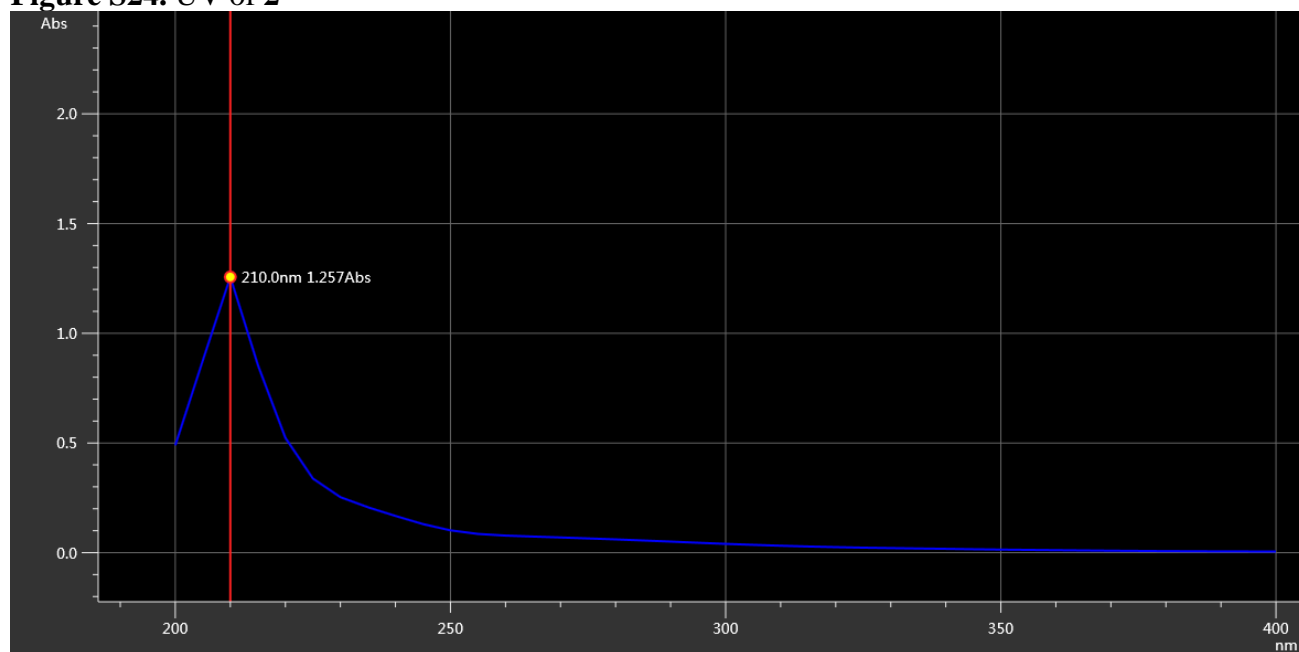

**Figure S25.** IR of **2**

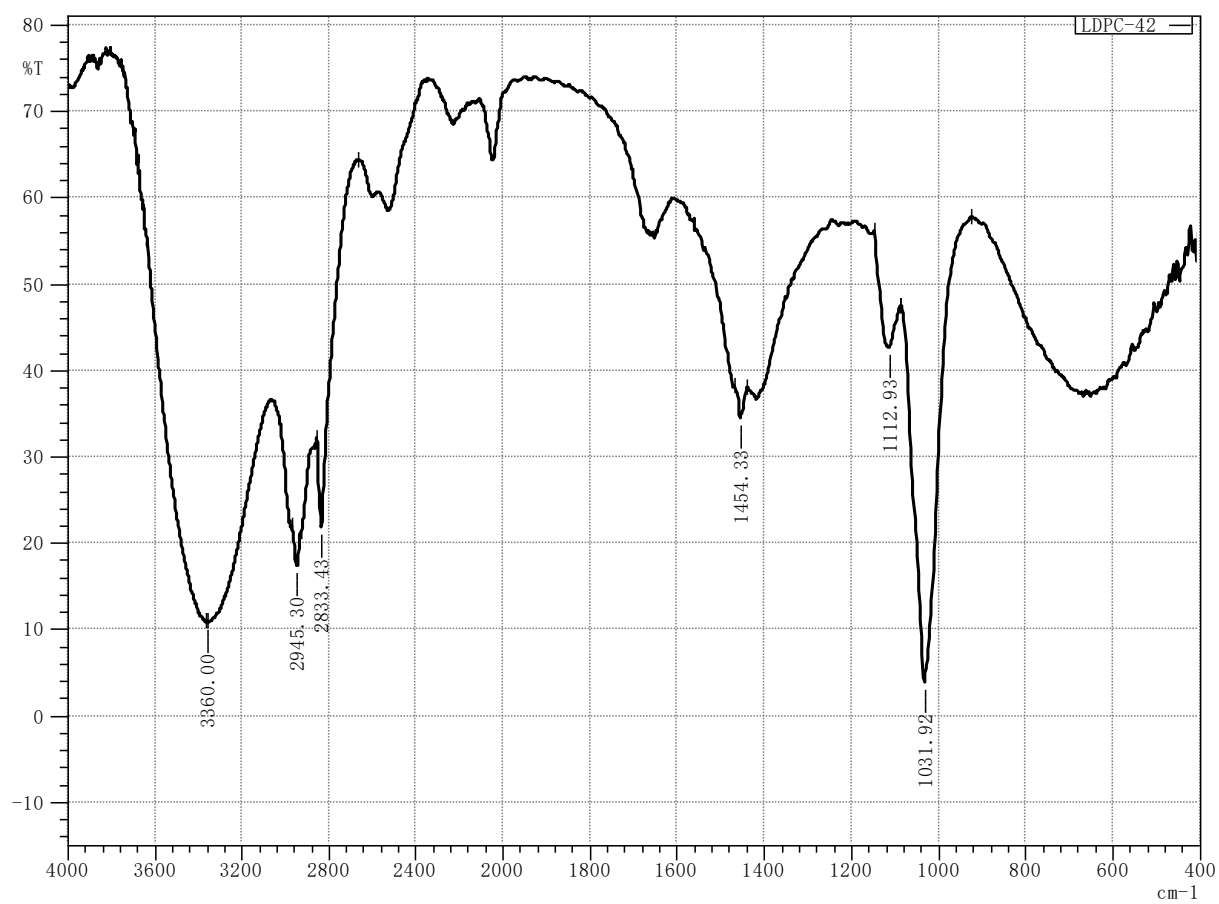

Supplement: s1 [file s1]
